# Supplementary material for: Copper-catalyzed aerobic hydroxyamination of alkenes of unsaturated keto oximes in EtOH toward cyclic nitrones
Source: Royal Society of Chemistry journal article supplement (doi:10.1039/d2gc00017b), 2022-01-01
Supplement: d2gc00017b2.pdf [file d2gc00017b2.pdf]

# Supplementary Information

## Copper-Catalyzed Aerobic Oxyamination of Alkenes of Unsaturated Keto Oximes in EtOH Toward Cyclic Nitrones

Xiao-Dong Liu,<sup>ac</sup> Qiu-An Wang,<sup>a</sup> Yan-Ping Zhu,<sup>\*b</sup> Zhi-Hong Peng,<sup>\*a</sup> and Jin-Heng Li<sup>\*abcd</sup>

- <sup>a.</sup> State Key Laboratory of Chemo/Biosensing and Chemometrics, Hunan University, Changsha 410082, China. E-mail: [jhli@hnu.edu.cn](mailto:jhli@hnu.edu.cn), [pzh7251@hnu.edu.cn](mailto:pzh7251@hnu.edu.cn)
- <sup>b.</sup> School of Pharmacy, Key Laboratory of Molecular Pharmacology and Drug Evaluation, Ministry of Education, Collaborative Innovation Center of Advanced Drug Delivery System and Biotech Drugs in Universities of Shandong, Yantai University, Shandong, Yantai, 264005, China. E-mail: [chemzyp@foxmail.com](mailto:chemzyp@foxmail.com)
- <sup>c.</sup> Key Laboratory of Jiangxi Province for Persistent Pollutants Control and Resources Recycle, Nanchang Hangkong University, Nanchang 330063, China.
- <sup>d.</sup> School of Chemistry and Chemical Engineering, Henan Normal University, Xinxiang, Henan 475004, China.

### Contents

**(A) General Information**

**(B) Analytical Data**

**(C) NMR Spectra of 2**

**(D) The X-ray Single-Crystal Diffraction Analysis of 2a**

**(E) References**

## (A) General Information

$^1\text{H}$ -NMR and  $^{13}\text{C}$ -NMR spectra were recorded at room temperature using a Bruker Avance-500 instruments or Avance-400 instruments ( $^1\text{H}$  NMR at 500 MHz and  $^{13}\text{C}$  NMR at 125 MHz), NMR spectra of all products were reported in ppm with reference to solvent signals [ $^1\text{H}$  NMR:  $\text{CD}(\text{H})\text{Cl}_3$  (7.26 ppm),  $^{13}\text{C}$  NMR:  $\text{CD}(\text{H})\text{Cl}_3$  (77.00 ppm)]. High-resolution mass spectra (HRMS) was recorded on an electrospray ionization (ESI) apparatus using time-of-flight (TOF) mass spectrometry. Melting Points were recorded on Hanon MP100 Apparatus and were uncorrected. All the unsaturated oximes **1** were prepared according to the known procedures.<sup>1</sup> Unless otherwise noted, all reactions were carried out using standard Schlenk techniques, and the starting materials and solvents were commercially available and were used without further purification. Column chromatography was performed on silica gel (200-300 mesh) using petroleum ether (PE)/ethyl acetate (EA).

### (a) General procedure for the synthesis of compounds **2**

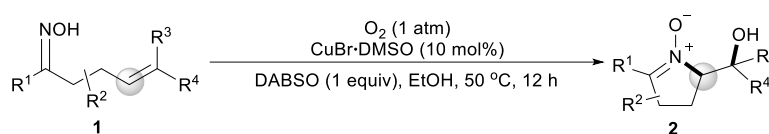

To a Schlenk tube were added 4-en-1-one oxime **1** (40.6 mg, 0.2 mmol),  $\text{CuBr}\cdot\text{DMSO}$  (0.02 mmol; 10 mol%),  $\text{DABSO}$  (1 equiv) and  $\text{EtOH}$  (2 mL). Then the tube was charged with  $\text{O}_2$  three times, and the mixture was stirred at  $50\text{ }^\circ\text{C}$  for 12 h until complete consumption of starting material as monitored by TLC and/or GC-MS analysis. After the reaction was finished, the reaction mixture was washed by saturated  $\text{NaCl}$  solution ( $5\text{ mL} \times 3$ ), and diluted in diethyl ether. The combined organic extracts were dried over anhydrous  $\text{Na}_2\text{SO}_4$  and concentrated in vacuum. The resulting residue was purified by silica gel column chromatography (hexane/ethyl acetate = 2:1) to afford **2**.

**(b) General Procedure for 1 mmol Scale of 1a.**

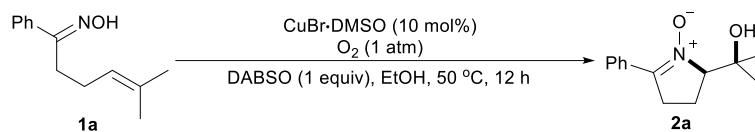

To a Schlenk tube were added 5-methyl-1-phenylhex-4-en-1-one oxime **1a** (1 mmol), CuBr-DMSO (10 mol%), DABSO (1 equiv) and EtOH (4 mL). Then the tube was charged with O<sub>2</sub> three times, and was stirred at 50 °C for 12 h until complete consumption of starting material as monitored by TLC and/or GC-MS analysis. After the reaction was finished, the reaction mixture was washed by saturated NaCl solution (5 mL × 3), and diluted in diethyl ether. The combined organic extracts were dried over anhydrous Na<sub>2</sub>SO<sub>4</sub> and concentrated in vacuum. The resulting residue was purified by silica gel column chromatography (hexane/ethyl acetate = 2:1) to afford **2** (64% yield; 140.2 mg).

(c) The  $^{18}\text{O}$  isotope Labelling Experiments.

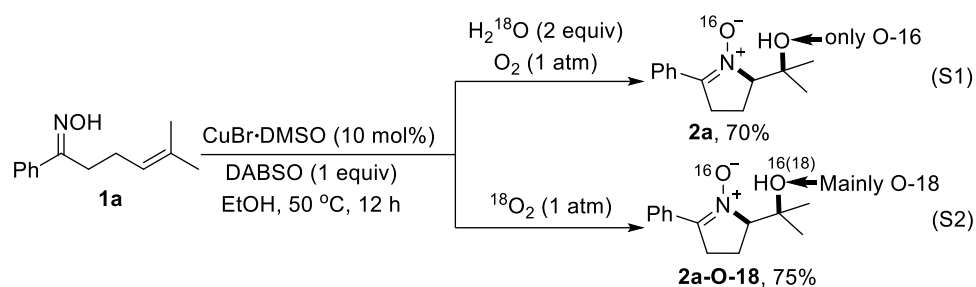

The product **2a** was purified by flash chromatography to give 30.7 mg (70%) as yellow solid. mp 126–128 °C.  $^1\text{H}$  NMR ( $\text{CDCl}_3$ , 500 MHz)  $\delta$  = 8.33 (s, 2H), 7.46 (s, 3H), 6.72 (s, 1H), 4.26 (t,  $J$  = 7.5 Hz, 1H), 3.09 (s, 1H), 2.31-2.35 (m, 1H), 1.80-1.87 (m, 1H), 1.24 (s, 6H).  $^{13}\text{C}$  NMR ( $\text{CDCl}_3$ , 125 MHz)  $\delta$  = 142.1, 130.7, 128.5, 128.4, 127.6, 80.1, 72.4, 28.6, 26.5, 21.9, 19.4. HRMS (ESI)  $m/z$  calcd for  $\text{C}_{13}\text{H}_{18}\text{NO}_2^+$  ( $\text{M}+\text{H}$ ) $^+$  220.1332, found 220.1335.

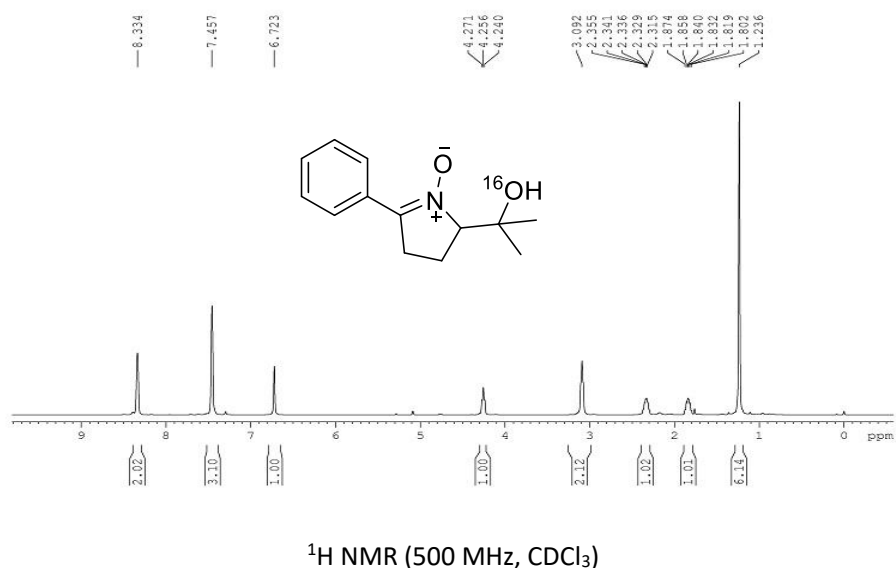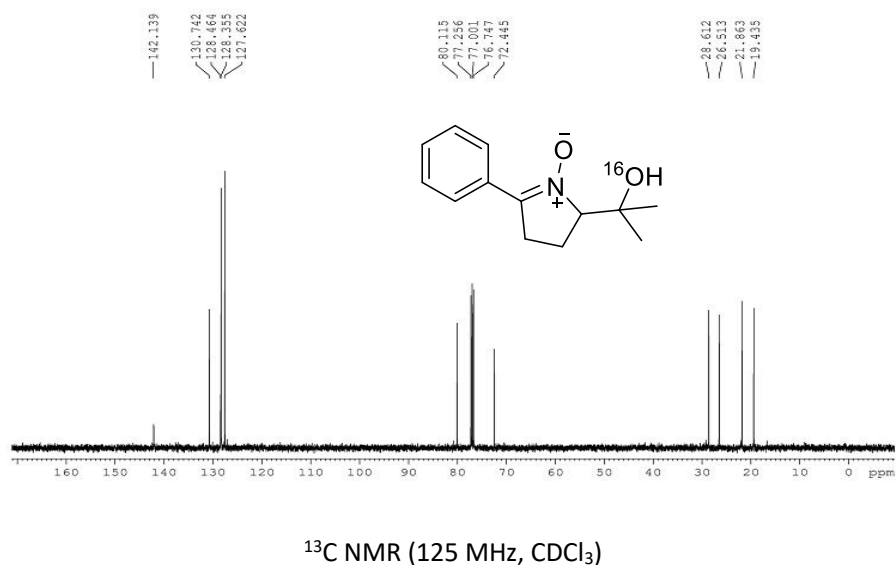

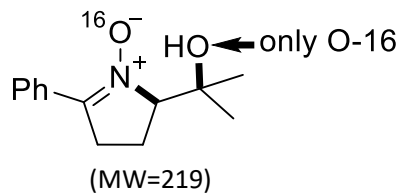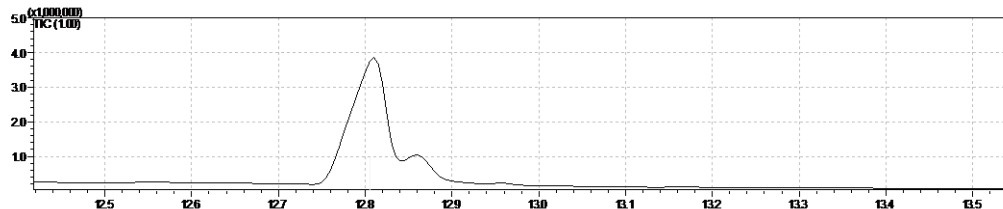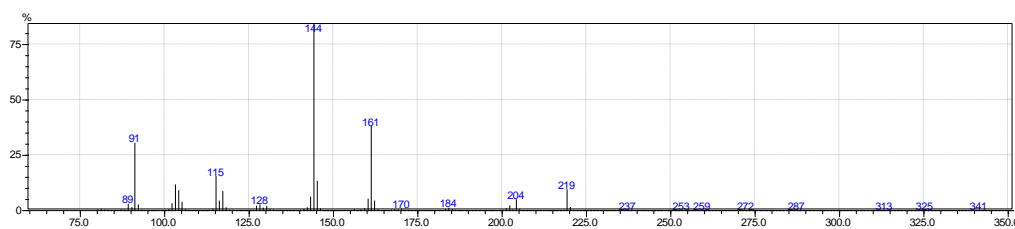

[MS Spectrum]

# of Peaks 516

Raw Spectrum 12.805 (scan: 1762) Base Peak m/z 144.20 (Inten : 1,180,594)

Background No Background Spectrum

m/z Absolute Intensity Relative Intensity

|        |        |       |        |         |        |               |               |             |
|--------|--------|-------|--------|---------|--------|---------------|---------------|-------------|
| 89.15  | 34681  | 2.94  | 118.20 | 15558   | 1.32   | 161.20        | 449729        | 38.09       |
| 90.25  | 16749  | 1.42  | 127.20 | 24751   | 2.10   | 162.20        | 52257         | 4.43        |
| 91.15  | 360127 | 30.50 | 128.20 | 31860   | 2.70   | 201.25        | 11797         | 1.00        |
| 92.15  | 31160  | 2.64  | 129.20 | 14356   | 1.22   | 202.25        | 26447         | 2.24        |
| 102.15 | 38335  | 3.25  | 130.20 | 23620   | 2.00   | 204.20        | 58708         | 4.97        |
| 103.15 | 137639 | 11.66 | 142.25 | 16233   | 1.37   | <b>219.25</b> | <b>112557</b> | <b>9.53</b> |
| 104.15 | 106717 | 9.04  | 143.25 | 73315   | 6.21   | <b>220.25</b> | <b>17441</b>  | <b>1.48</b> |
| 105.15 | 46081  | 3.90  | 144.20 | 1180594 | 100.00 | <b>221.20</b> | <b>1999</b>   | <b>0.17</b> |
| 114.25 | 8085   | 0.68  | 145.20 | 157036  | 13.30  | 222.20        | 292           | 0.02        |
| 115.20 | 182546 | 15.46 | 158.20 | 5444    | 0.46   | 223.20        | 209           | 0.02        |
| 116.20 | 52273  | 4.43  | 159.25 | 10839   | 0.92   |               |               |             |
| 117.20 | 102249 | 8.66  | 160.25 | 61843   | 5.24   |               |               |             |

The product **2a-O-18** was purified by flash chromatography to give 32.8 mg (75%) as yellow solid. mp 126–128 °C.  $^1\text{H}$  NMR ( $\text{CDCl}_3$ , 500 MHz)  $\delta$  = 8.33 (s, 2H), 7.46 (s, 3H), 6.74 (s, 1H), 4.27 (t,  $J$  = 8.0 Hz, 1H), 3.10 (s, 2H), 2.34-2.35 (m, 1H), 1.81-1.88 (m, 1H), 1.24 (s, 6H).  $^{13}\text{C}$  NMR ( $\text{CDCl}_3$ , 125 MHz)  $\delta$  = 142.3, 130.8, 128.4, 128.4, 127.7, 80.1, 72.6, 72.5, 28.6, 26.5, 21.9, 19.5.

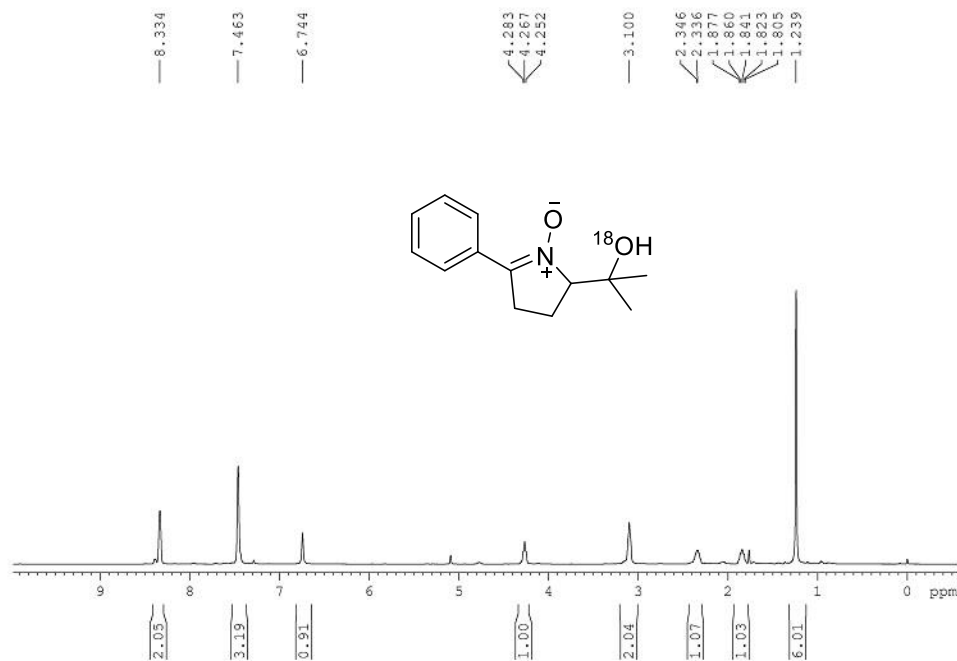

$^1\text{H}$  NMR (500 MHz,  $\text{CDCl}_3$ )

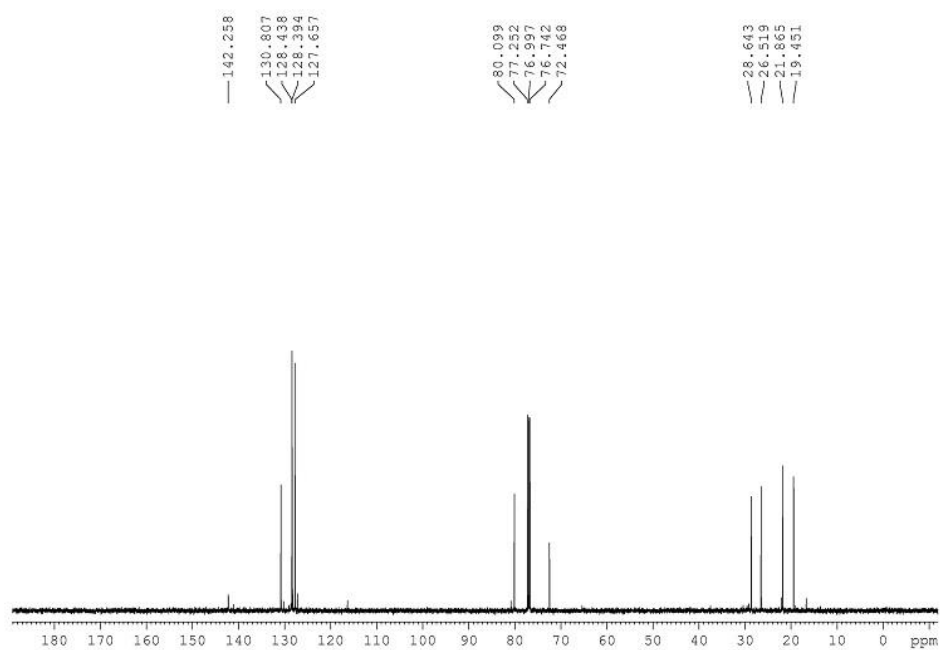

$^{13}\text{C}$  NMR (125 MHz,  $\text{CDCl}_3$ )

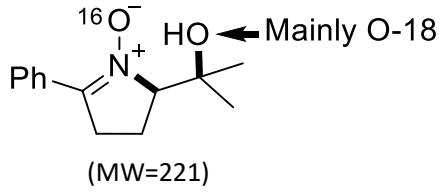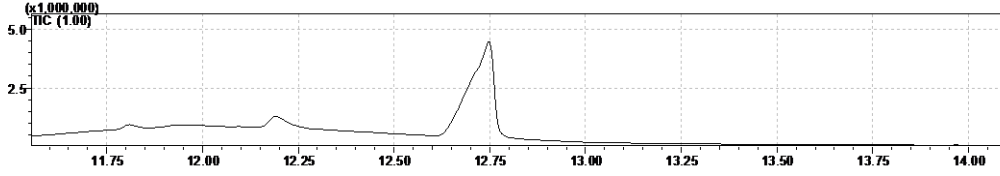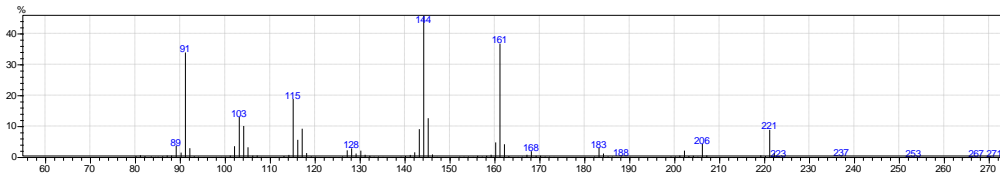

[MS Spectrum]

# of Peaks 483

Raw Spectrum 12.745 (scan : 1750) Base Peak m/z 144.15 (Inten : 1,339,450)

Background No Background Spectrum

| m/z    | Absolute Intensity | Relative Intensity | m/z    | Absolute Intensity | Relative Intensity | m/z           | Absolute Intensity | Relative Intensity |
|--------|--------------------|--------------------|--------|--------------------|--------------------|---------------|--------------------|--------------------|
| 89.05  | 49073              | 3.66               | 128.10 | 38140              | 2.85               | 184.15        | 15715              | 1.17               |
| 90.15  | 20024              | 1.49               | 129.10 | 15967              | 1.19               | 202.15        | 28148              | 2.10               |
| 91.10  | 45432              | 33.92              | 130.15 | 28547              | 2.13               | 206.15        | 57425              | 4.29               |
| 92.10  | 39252              | 2.93               | 142.15 | 20801              | 1.55               | 219.15        | 8052               | 0.60               |
| 102.05 | 47524              | 3.55               | 143.15 | 12162              | 9.08               | 220.20        | 4713               | 0.35               |
| 103.10 | 17444              | 13.02              | 144.15 | 13394              | 100.00             | <b>221.15</b> | <b>1189</b>        | <b>8.88</b>        |
| 104.10 | 13502              | 10.08              | 145.15 | 16883              | 12.60              | 222.15        | 1872               | 1.40               |
| 105.05 | 42823              | 3.20               | 159.15 | 10575              | 0.79               | 223.15        | 1639               | 0.12               |
| 115.10 | 25295              | 18.88              | 160.15 | 63993              | 4.78               | 224.10        | 268                | 0.02               |
| 116.10 | 75062              | 5.60               | 161.10 | 49236              | 36.76              | 225.10        | 95                 | 0.01               |
| 117.10 | 12347              | 9.22               | 162.10 | 56369              | 4.21               |               |                    |                    |
| 118.10 | 18038              | 1.35               | 168.10 | 25980              | 1.94               |               |                    |                    |
| 127.10 | 29986              | 2.24               | 183.15 | 40380              | 3.01               |               |                    |                    |

### (d) The TEMPO-trapped Experiments.

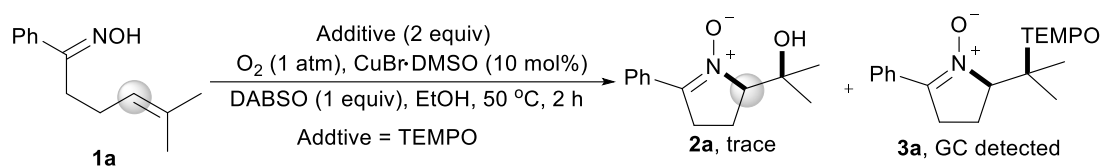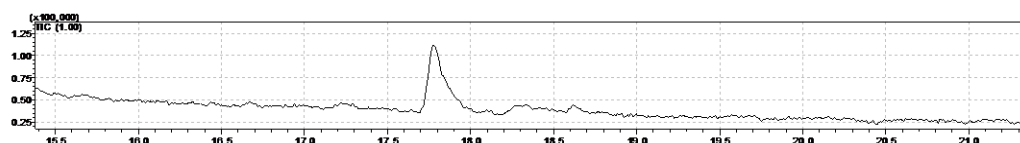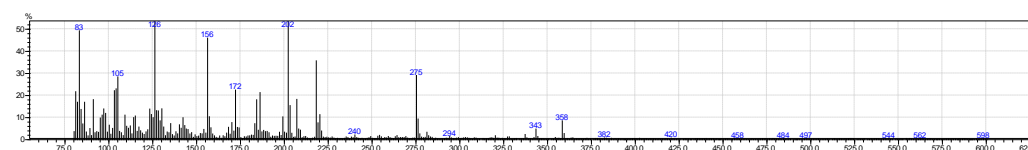

[MS Spectrum]

# of Peaks 509

Raw Spectrum 17.790 (scan : 2759)

Base Peak

m/z 126.20 (Inten : 7,908)

Background No Background Spectrum

m/z Absolute Intensity Relative Intensity

|        |      |       |               |             |               |        |      |       |
|--------|------|-------|---------------|-------------|---------------|--------|------|-------|
| 80.15  | 292  | 3.69  | 105.10        | 2249        | 28.44         | 130.15 | 1109 | 14.02 |
| 81.10  | 1721 | 21.76 | 106.10        | 302         | 3.82          | 131.20 | 458  | 5.79  |
| 82.10  | 1346 | 17.02 | 107.10        | 254         | 3.21          | 132.20 | 148  | 1.87  |
| 83.10  | 3903 | 49.36 | 108.10        | 151         | 1.91          | 133.20 | 279  | 3.53  |
| 84.15  | 1086 | 13.73 | 109.15        | 884         | 11.18         | 134.20 | 255  | 3.22  |
| 85.15  | 570  | 7.21  | 110.15        | 483         | 6.11          | 135.20 | 582  | 7.36  |
| 86.10  | 1346 | 17.02 | 111.15        | 415         | 5.25          | 136.20 | 188  | 2.38  |
| 87.10  | 278  | 3.52  | 112.15        | 499         | 6.31          | 137.20 | 138  | 1.75  |
| 88.10  | 142  | 1.80  | 113.10        | 215         | 2.72          | 138.20 | 287  | 3.63  |
| 89.15  | 406  | 5.13  | 114.10        | 796         | 10.07         | 139.20 | 212  | 2.68  |
| 90.10  | 151  | 1.91  | 115.05        | 854         | 10.80         | 140.20 | 537  | 6.79  |
| 91.10  | 1439 | 18.20 | 116.10        | 302         | 3.82          | 141.15 | 414  | 5.24  |
| 92.10  | 254  | 3.21  | 117.10        | 457         | 5.78          | 142.20 | 791  | 10.00 |
| 93.10  | 292  | 3.69  | 118.10        | 326         | 4.12          | 143.20 | 510  | 6.45  |
| 94.10  | 265  | 3.35  | 119.10        | 239         | 3.02          | 144.10 | 385  | 4.87  |
| 95.10  | 782  | 9.89  | 120.10        | 193         | 2.44          | 145.10 | 369  | 4.67  |
| 96.10  | 882  | 11.15 | 121.10        | 282         | 3.57          | 146.10 | 207  | 2.62  |
| 97.05  | 1104 | 13.96 | 122.15        | 360         | 4.55          | 147.10 | 258  | 3.26  |
| 98.15  | 944  | 11.94 | 123.25        | 1100        | 13.91         | 148.10 | 90   | 1.14  |
| 99.10  | 274  | 3.46  | 124.20        | 906         | 11.46         | 149.10 | 178  | 2.25  |
| 100.15 | 526  | 6.65  | 125.20        | 794         | 10.04         | 150.10 | 114  | 1.44  |
| 101.10 | 202  | 2.55  | <b>126.20</b> | <b>7908</b> | <b>100.00</b> | 151.10 | 135  | 1.71  |
| 102.10 | 407  | 5.15  | 127.20        | 1044        | 13.20         | 152.10 | 225  | 2.85  |
| 103.10 | 1758 | 22.23 | 128.15        | 1034        | 13.08         | 153.10 | 215  | 2.72  |
| 104.10 | 1823 | 23.05 | 129.15        | 680         | 8.60          | 154.10 | 375  | 4.74  |



|        |      |       |        |      |       |               |            |             |
|--------|------|-------|--------|------|-------|---------------|------------|-------------|
| 155.20 | 239  | 3.02  | 190.20 | 302  | 3.82  | 235.20        | 102        | 1.29        |
| 156.20 | 3642 | 46.05 | 191.20 | 255  | 3.22  | 236.20        | 82         | 1.04        |
| 157.20 | 828  | 10.47 | 192.20 | 94   | 1.19  | 240.20        | 172        | 2.18        |
| 158.15 | 430  | 5.44  | 193.20 | 138  | 1.75  | 241.20        | 81         | 1.02        |
| 159.10 | 207  | 2.62  | 194.20 | 124  | 1.57  | 249.20        | 116        | 1.47        |
| 160.10 | 140  | 1.77  | 195.20 | 129  | 1.63  | 253.20        | 129        | 1.63        |
| 161.10 | 90   | 1.14  | 196.20 | 124  | 1.57  | 254.20        | 162        | 2.05        |
| 165.10 | 148  | 1.87  | 197.20 | 273  | 3.45  | 269.20        | 116        | 1.47        |
| 166.10 | 113  | 1.43  | 198.10 | 156  | 1.97  | 275.25        | 2305       | 29.15       |
| 167.10 | 239  | 3.02  | 199.10 | 822  | 10.39 | 276.20        | 745        | 9.42        |
| 168.15 | 448  | 5.67  | 200.10 | 274  | 3.46  | 277.20        | 212        | 2.68        |
| 169.10 | 202  | 2.55  | 201.20 | 239  | 3.02  | 281.20        | 271        | 3.43        |
| 170.05 | 618  | 7.81  | 202.20 | 7294 | 92.24 | 282.20        | 148        | 1.87        |
| 171.20 | 311  | 3.93  | 203.20 | 1225 | 15.49 | 283.20        | 102        | 1.29        |
| 172.15 | 1780 | 22.51 | 204.20 | 234  | 2.96  | 284.20        | 90         | 1.14        |
| 173.20 | 442  | 5.59  | 205.20 | 87   | 1.10  | 294.20        | 121        | 1.53        |
| 174.20 | 428  | 5.41  | 206.10 | 103  | 1.30  | 320.20        | 146        | 1.85        |
| 177.20 | 111  | 1.40  | 207.10 | 1446 | 18.29 | 327.20        | 102        | 1.29        |
| 178.20 | 100  | 1.26  | 208.10 | 386  | 4.88  | 328.20        | 108        | 1.37        |
| 179.20 | 137  | 1.73  | 209.10 | 345  | 4.36  | 342.20        | 81         | 1.02        |
| 180.20 | 140  | 1.77  | 210.10 | 74   | 0.94  | 343.35        | 387        | 4.89        |
| 181.20 | 169  | 2.14  | 211.10 | 113  | 1.43  | 344.40        | 118        | 1.49        |
| 182.20 | 158  | 2.00  | 212.10 | 122  | 1.54  | 354.40        | 86         | 1.09        |
| 183.15 | 579  | 7.32  | 217.20 | 94   | 1.19  | 355.40        | 54         | 0.68        |
| 184.20 | 1434 | 18.13 | 218.15 | 2826 | 35.74 | 356.40        | 58         | 0.73        |
| 185.15 | 343  | 4.34  | 219.15 | 608  | 7.69  | 357.40        | 41         | 0.52        |
| 186.15 | 1692 | 21.40 | 220.20 | 903  | 11.42 | <b>358.35</b> | <b>680</b> | <b>8.60</b> |
| 187.20 | 286  | 3.62  | 221.20 | 314  | 3.97  | 359.40        | 228        | 2.88        |
| 188.20 | 338  | 4.27  | 222.20 | 97   | 1.23  | 360.40        | 44         | 0.56        |
| 189.20 | 294  | 3.72  | 227.20 | 102  | 1.29  |               |            |             |

### (e) EPR spectra Experiments

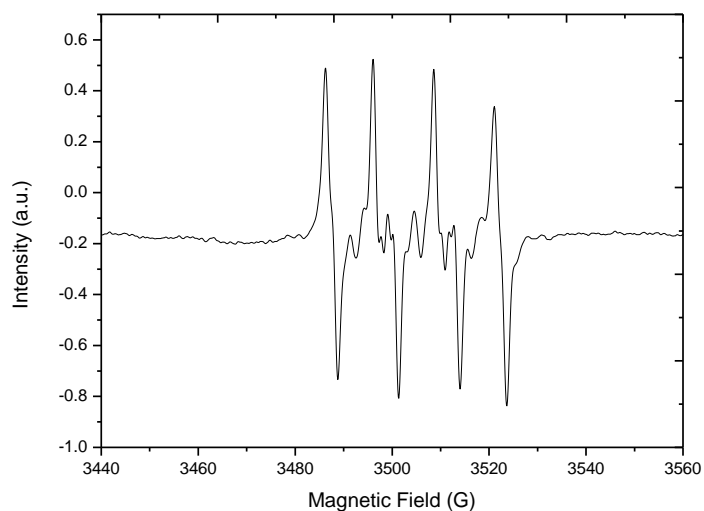

**Figure S1. EPR spectra of reaction system:** 1a (0.20 mmol), CuBr-DMSO (0.020 mmol), DABSO(0.2 mmol), EtOH (2 mL), stirred at 50 °C under O<sub>2</sub> (1 atm), 0.5 h. 0.01 mL of this reaction solution was taken out into a small tube, followed by the addition of 0.01 mL DMPO (5\*10<sup>-2</sup> M). Then, this mixture was analyzed by EPR. There are classical 4 peaks the signals corresponding to (DMPO–O(H)).

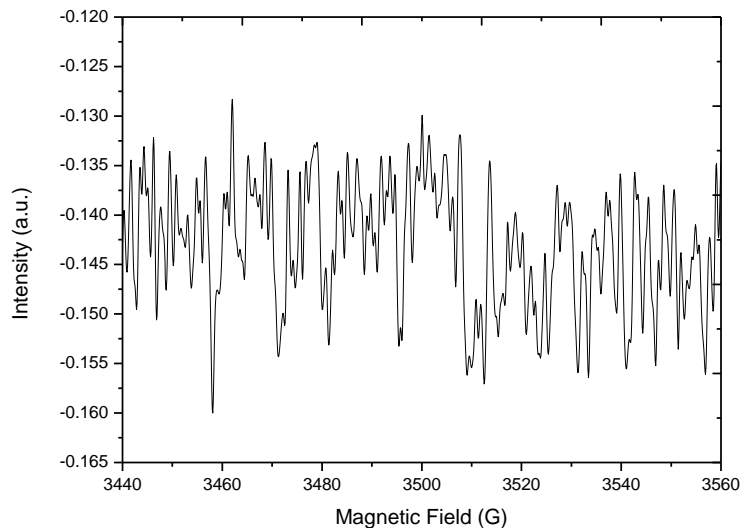

**Figure S2. EPR spectra of reaction system:** 1a (0.20 mmol), CuBr-DMSO (0.020 mmol), DABSO(0.2 mmol), EtOH (2 mL), stirred at 50 °C under O<sub>2</sub> (1 atm), 0.5 h. 0.01 mL of this reaction solution was taken out into a small tube, mixed well with 0.01 mL SOD solvent (1\*10<sup>-2</sup> M), followed by the addition of 0.01 mL DMPO (5\*10<sup>-2</sup> M). Then, this mixture was analyzed by EPR analysis.

In the EPR spectra monitored with the addition of the radical trap 5-,5-dimethyl-1-pyrroline N-oxide (DMPO), the signal corresponding to DMPO–O(H) has been identified which are classical four peaks. Furthermore, the EPR analysis results demonstrate that the hydroxyl radical may be derived from a superoxide compound.

(f) The UV-Visible Spectroscopic Analyses DABSO and 1a effect of catalyst.

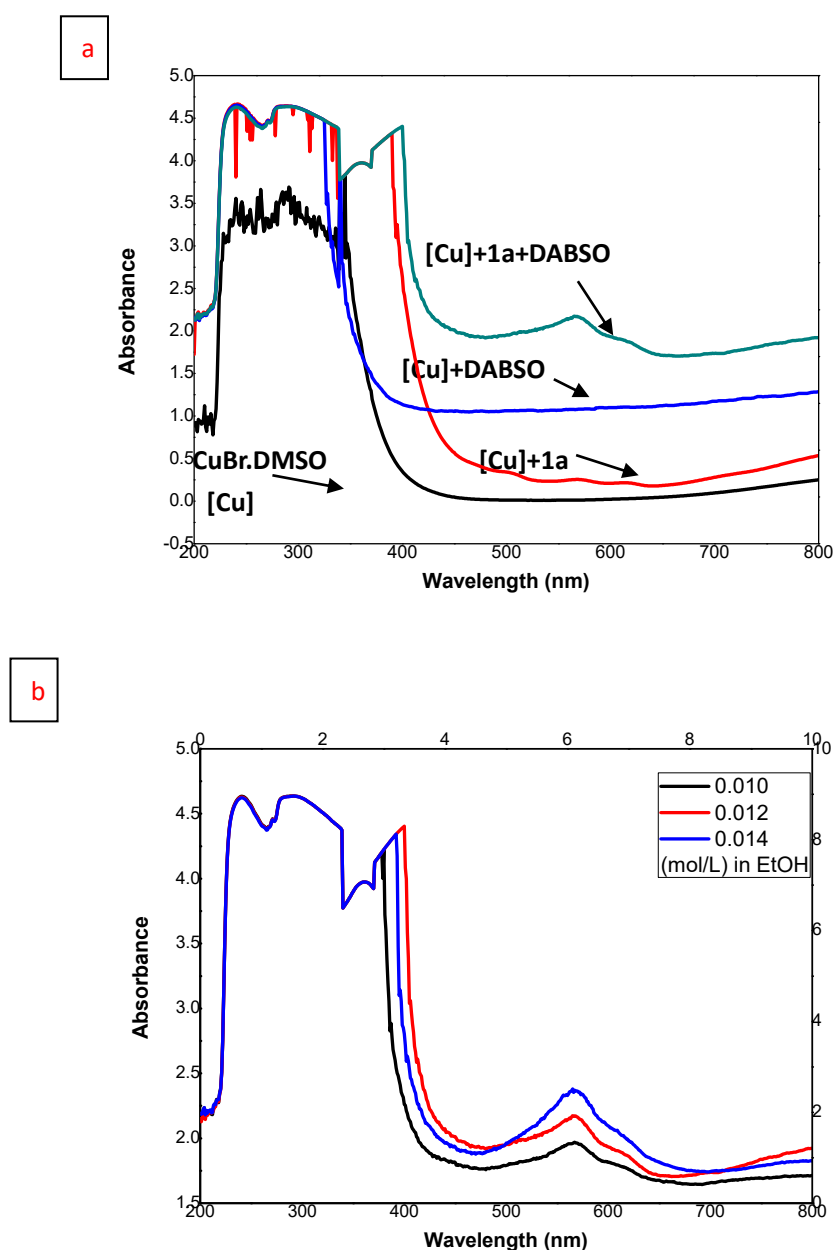

**Figure S3: The UV-Visible spectroscopic experiment.** (a) CuBr·DMSO (0.01 mmol/mL) in EtOH (dark line); both CuBr·DMSO (0.01 mmol/mL) and 1a (0.01 mmol/mL) in EtOH (red line); both CuBr·DMSO (0.01 mmol/mL) and DABSO (0.01 mmol/mL) in EtOH (blue line); CuBr·DMSO (0.01 mmol/mL), 1a (0.01 mmol/mL) and DABSO (0.01 mmol/mL) in EtOH (green line). (b) CuBr·DMSO (0.01 mmol/mL), DABSO (0.01 mmol/mL) and various concentrations of 1a in EtOH.

Figure S3 (a) shows that coordination of the **1a** with the  $\text{Cu}^I$  forms the new complex **Cu-DABSO-1a** as the maximum absorption (Figure 1). But in the absence of **DABSO**, CuBr·DMSO or CuBr·DMSO /**1a** has no absorption peaks in the visible light region. Meanwhile, a variation of the absorbance was also along with the solution concentration of **1a** changing, suggesting that the **DABSO** is indispensable and a coordination the  $\text{Cu}^I$  species with **DABSO** and **1a** occurs.

## (B) Analytical Data

### 2-(2-hydroxypropan-2-yl)-5-phenyl-3,4-dihydro-2H-pyrrole 1-oxide (2a)

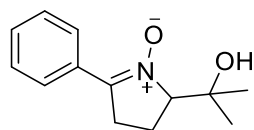

The product was purified by flash chromatography to give 32.9 mg (75%) as a yellow solid. mp 126–128 °C.  $^1\text{H}$  NMR ( $\text{CDCl}_3$ , 500 MHz)  $\delta$  = 8.33 (s, 2H), 7.46 (s, 3H), 6.72 (s, 1H), 4.26 (t,  $J$  = 7.5 Hz, 1H), 3.09 (s, 1H), 2.31–2.35 (m, 1H), 1.80–1.87 (m, 1H), 1.24 (s, 6H).  $^{13}\text{C}$  NMR ( $\text{CDCl}_3$ , 125 MHz)  $\delta$  = 142.1, 130.7, 128.5, 128.4, 127.6, 80.1, 72.4, 28.6, 26.5, 21.9, 19.4. HRMS (ESI)  $m/z$  calcd for  $\text{C}_{13}\text{H}_{18}\text{NO}_2^+$  ( $\text{M}+\text{H}$ ) $^+$  220.1332, found 220.1335.

### 2-(2-hydroxypropan-2-yl)-5-(p-tolyl)-3,4-dihydro-2H-pyrrole 1-oxide (2b)

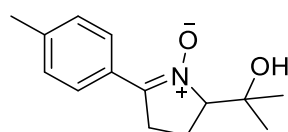

The product was purified by flash chromatography to give 35.0 mg (75%) as a yellow solid. mp 132–134 °C.  $^1\text{H}$  NMR ( $\text{CDCl}_3$ , 500 MHz)  $\delta$  = 8.24 (d,  $J$  = 7.5 Hz, 2H), 7.27 (d,  $J$  = 7.0 Hz, 2H), 6.78 (s, 1H), 4.26 (t,  $J$  = 7.5 Hz, 1H), 3.08 (d,  $J$  = 6.5 Hz, 2H), 2.40 (s, 3H), 2.31–2.37 (m, 1H), 1.79–1.87 (m, 1H), 1.23 (s, 6H).  $^{13}\text{C}$  NMR ( $\text{CDCl}_3$ , 125 MHz)  $\delta$  = 142.3, 141.4, 129.2, 127.7, 125.8, 80.0, 72.6, 28.7, 26.6, 21.9, 21.6, 19.5. HRMS (ESI)  $m/z$  calcd for  $\text{C}_{14}\text{H}_{20}\text{NO}_2^+$  ( $\text{M}+\text{H}$ ) $^+$  234.1489, found 234.1478.

### 5-(4-(tert-butyl)phenyl)-2-(2-hydroxypropan-2-yl)-3,4-dihydro-2H-pyrrole 1-oxide (2c)

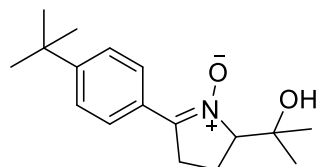

The product was purified by flash chromatography to give 41.8 mg (76%) as a yellow solid. mp 105–107 °C.  $^1\text{H}$  NMR ( $\text{CDCl}_3$ , 500 MHz)  $\delta$  = 8.26 (d,  $J$  = 10.5 Hz, 2H), 7.48 (d,  $J$  = 10.5 Hz, 2H), 6.79 (s, 1H), 4.25 (t,  $J$  = 9.5 Hz, 1H), 3.06–3.10 (m, 2H), 2.28–2.37 (m, 1H), 1.77–1.87 (m, 1H), 1.32 (s, 9H), 1.22 (s, 6H).  $^{13}\text{C}$  NMR ( $\text{CDCl}_3$ , 125 MHz)  $\delta$  = 154.4, 142.1, 127.6, 125.9, 125.4, 80.0, 72.6, 35.0, 31.0, 28.7, 26.6, 21.9, 19.6. HRMS (ESI)  $m/z$  calcd for  $\text{C}_{17}\text{H}_{26}\text{NO}_2^+$  ( $\text{M}+\text{H}$ ) $^+$  276.1958, found 276.1934.

### 2-(2-hydroxypropan-2-yl)-5-(4-methoxyphenyl)-3,4-dihydro-2H-pyrrole 1-oxide (2d)

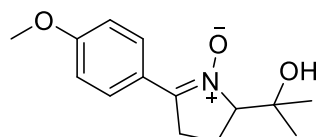

The product was purified by flash chromatography to give 38.8 mg (78%) as a yellow solid. mp 127–129 °C.  $^1\text{H}$  NMR ( $\text{CDCl}_3$ , 500 MHz)  $\delta$  = 8.34 (d,  $J$  = 7.5 Hz, 2H), 6.97 (d,  $J$  = 8.0 Hz, 2H), 6.85 (s, 1H), 4.24 (s, 1H), 3.86 (s, 3H), 3.07 (s, 2H), 2.30–2.36 (m, 1H), 1.80–1.84 (m, 1H), 1.23 (s, 6H).  $^{13}\text{C}$  NMR ( $\text{CDCl}_3$ , 125 MHz)  $\delta$  = 161.3, 142.0, 129.7, 121.4, 113.8, 79.7, 72.6, 55.3, 28.7, 26.6, 22.0, 19.5. HRMS (ESI)  $m/z$  calcd for  $\text{C}_{14}\text{H}_{20}\text{NO}_3^+$  ( $\text{M}+\text{H}$ ) $^+$  250.1438, found 250.1445.

#### 5-(4-fluorophenyl)-2-(2-hydroxypropan-2-yl)-3,4-dihydro-2H-pyrrole 1-oxide (2e)

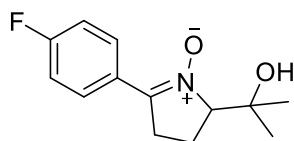

The product was purified by flash chromatography to give 33.7 mg (71%) as a yellow solid. mp 105–107 °C. <sup>1</sup>H NMR (CDCl<sub>3</sub>, 500 MHz) δ = 8.40 (s, 2H), 7.15 (t, *J* = 7.5 Hz, 2H), 6.68 (s, 1H), 4.28 (t, *J* = 8.0 Hz, 1H), 3.09 (s, 2H), 2.36 (t, *J* = 6.0 Hz, 1H), 1.82–1.89 (m, 1H), 1.24 (s, 6H). <sup>13</sup>C NMR (CDCl<sub>3</sub>, 125 MHz) δ = 163.5 (d, *J* = 252.0 Hz), 141.3, 130.1 (d, *J* = 8.4 Hz), 124.9, 115.6 (d, *J* = 21.5 Hz), 80.0, 72.5, 28.7, 26.5, 21.9, 19.4. <sup>19</sup>F NMR (471 MHz, CDCl<sub>3</sub>) δ (ppm) -107.0. HRMS (ESI) *m/z* calcd for C<sub>13</sub>H<sub>17</sub>FNO<sub>2</sub><sup>+</sup> (M+H)<sup>+</sup> 238.1238, found 238.1246.

#### 5-(4-chlorophenyl)-2-(2-hydroxypropan-2-yl)-3,4-dihydro-2H-pyrrole 1-oxide (2f)

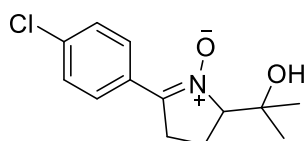

The product was purified by flash chromatography to give 36.9 mg (73%) as a yellow solid. mp 120–122 °C. <sup>1</sup>H NMR (CDCl<sub>3</sub>, 500 MHz) δ = 8.31 (d, *J* = 7.5 Hz, 2H), 7.43 (d, *J* = 7.5 Hz, 2H), 6.58 (s, 1H), 4.27 (t, *J* = 8.5 Hz, 1H), 3.08 (s, 2H), 2.36 (t, *J* = 5.5 Hz, 1H), 1.84–1.88 (m, 1H), 1.24 (s, 6H). <sup>13</sup>C NMR (CDCl<sub>3</sub>, 125 MHz) δ = 141.2, 136.5, 129.0, 128.7, 127.0, 80.2, 72.5, 28.6, 26.6, 21.9, 19.5. HRMS (ESI) *m/z* calcd for C<sub>13</sub>H<sub>17</sub><sup>35</sup>ClNO<sub>2</sub><sup>+</sup> (M+H)<sup>+</sup> 254.0942, found 254.0943.

#### 2-(2-hydroxypropan-2-yl)-5-(4-(trifluoromethyl)phenyl)-3,4-dihydro-2H-pyrrole 1-oxide (2g)

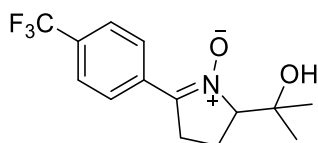

The product was purified by flash chromatography to give 39.6 mg (69%) as a yellow solid. mp 142–144 °C. <sup>1</sup>H NMR (CDCl<sub>3</sub>, 500 MHz) δ = 8.46 (d, *J* = 8.0 Hz, 2H), 7.72 (d, *J* = 7.0 Hz, 2H), 6.43 ((s, 1H), 4.32 (t, *J* = 8.0 Hz, 1H), 3.14 (s, 2H), 2.37–2.41 (m, 1H), 1.86–1.94 (m, 1H), 1.26 (s, 6H). <sup>13</sup>C NMR (CDCl<sub>3</sub>, 125 MHz) δ = 141.0, 132.0 (d, *J* = 32.4 Hz), 131.7, 127.9, 125.5 (q, *J* = 3.8 Hz), 123.7 (d, *J* = 269.4 Hz), 80.8, 72.7, 28.7, 26.7, 22.0, 19.7. <sup>19</sup>F NMR (471 MHz, CDCl<sub>3</sub>) δ (ppm) -73.6. HRMS (ESI) *m/z* calcd for C<sub>14</sub>H<sub>17</sub>F<sub>3</sub>NO<sub>2</sub><sup>+</sup> (M+H)<sup>+</sup> 288.1206, found 288.1218.

#### 2-(2-hydroxypropan-2-yl)-5-(*m*-tolyl)-3,4-dihydro-2H-pyrrole 1-oxide (2h)

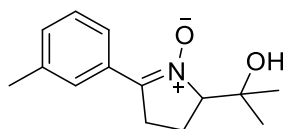

The product was purified by flash chromatography to give 34.5 mg (74%) as a yellow solid. mp 113–115 °C. <sup>1</sup>H NMR (CDCl<sub>3</sub>, 500 MHz) δ = 8.27 (s, 1H), 8.05 (d, *J* = 9.5 Hz, 1H), 7.37 (t, *J* = 9.5 Hz, 1H), 7.29 (d, *J* = 10.0 Hz, 1H), 6.76 (s, 1H), 4.28 (t, *J* = 10.5 Hz, 1H), 3.11 (s, 1H), 2.42 (s, 3H), 2.31–2.38 (m, 1H), 1.80–1.90 (m, 1H), 1.25 (s, 6H). <sup>13</sup>C NMR (CDCl<sub>3</sub>, 125 MHz) δ = 142.5, 138.2, 131.8, 128.4, 128.3, 128.2, 125.0, 80.2, 72.6, 28.8, 26.6, 21.9, 21.5, 19.6. HRMS (ESI) *m/z* calcd for C<sub>14</sub>H<sub>20</sub>NO<sub>2</sub><sup>+</sup> (M+H)<sup>+</sup> 234.1489, found 234.1494.

#### 2-(2-hydroxypropan-2-yl)-5-(3-methoxyphenyl)-3,4-dihydro-2H-pyrrole 1-oxide (2i)

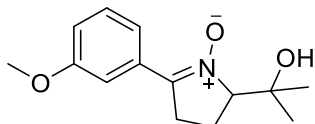

The product was purified by flash chromatography to give 39.8 mg (80%) as a yellow solid. mp 125–127 °C.  $^1\text{H}$  NMR ( $\text{CDCl}_3$ , 500 MHz)  $\delta$  = 8.23 (s, 1H), 7.66 (d,  $J$  = 10.0 Hz, 1H), 7.36 (t,  $J$  = 10.5 Hz, 1H), 7.02 (dd,  $J$  = 10.5 Hz, 1H), 6.66 (s, 1H), 4.27 (t,  $J$  = 10.5 Hz, 1H), 3.86 (s, 3H), 3.06-3.11 (m, 2H), 2.29-2.38 (m, 1H), 1.82-1.88 (m, 1H), 1.23 (s, 6H).  $^{13}\text{C}$  NMR ( $\text{CDCl}_3$ , 125 MHz)  $\delta$  = 159.5, 142.1, 129.8, 129.4, 120.3, 117.3, 112.5, 80.5, 72.6, 55.4, 28.9, 26.7, 22.0, 19.6. HRMS (ESI)  $m/z$  calcd for  $\text{C}_{14}\text{H}_{20}\text{NO}_3^+$  ( $\text{M}+\text{H}$ ) $^+$  250.1438, found 250.1449.

**5-(3-chlorophenyl)-2-(2-hydroxypropan-2-yl)-3,4-dihydro-2H-pyrrole 1-oxide (2j)**

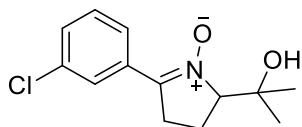

The product was purified by flash chromatography to give 34.4 mg (68%) as a yellow solid. mp 105–107 °C.  $^1\text{H}$  NMR ( $\text{CDCl}_3$ , 500 MHz)  $\delta$  = 8.44 (s, 1H), 8.12 (d,  $J$  = 9.5 Hz, 1H), 7.36-7.43 (m, 2H), 6.49 (s, 1H), 4.27 (t,  $J$  = 10.5 Hz, 1H), 3.05-3.09 (m, 2H), 2.31-2.40 (m, 1H), 1.82-1.90 (m, 1H), 1.23 (s, 6H).  $^{13}\text{C}$  NMR ( $\text{CDCl}_3$ , 125 MHz)  $\delta$  = 140.9, 134.6, 130.8, 130.2, 129.7, 127.5, 125.7, 80.6, 72.6, 28.6, 26.6, 22.0, 19.6. HRMS (ESI)  $m/z$  calcd for  $\text{C}_{13}\text{H}_{17}^{35}\text{ClNO}_2^+$  ( $\text{M}+\text{H}$ ) $^+$  254.0942, found 254.0943.

**2-(2-hydroxypropan-2-yl)-4,4-dimethyl-5-(thiophen-2-yl)-3,4-dihydro-2H-pyrrole 1-oxide (2k)**

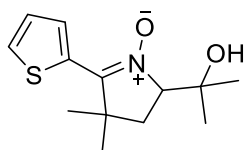

The product was purified by flash chromatography to give 35.4 mg (70%) as a yellow solid. mp 95–97 °C.  $^1\text{H}$  NMR ( $\text{CDCl}_3$ , 500 MHz)  $\delta$  = 7.70 (d,  $J$  = 3.5 Hz, 1H), 7.55 (d,  $J$  = 5.0 Hz, 1H), 7.17 (t,  $J$  = 4.0 Hz, 1H), 6.33 (s, 1H), 4.20 (t,  $J$  = 9.5 Hz, 1H), 2.15-2.19 (m, 1H), 1.68-1.72 (m, 1H), 1.59 (s, 3H), 1.47 (s, 3H), 1.20 (s, 3H), 1.17 (s, 3H).  $^{13}\text{C}$  NMR ( $\text{CDCl}_3$ , 125 MHz)  $\delta$  = 146.5, 129.5, 128.7, 127.7, 126.3, 75.2, 72.0, 42.4, 38.9, 28.7, 27.0, 26.3, 21.8. HRMS (ESI)  $m/z$  calcd for  $\text{C}_{13}\text{H}_{20}\text{NO}_2\text{S}^+$  ( $\text{M}+\text{H}$ ) $^+$  254.1209, found 254.1213.

**2-(2-hydroxypropan-2-yl)-4,4-dimethyl-5-phenyl-3,4-dihydro-2H-pyrrole 1-oxide (2l)**

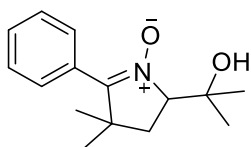

The product was purified by flash chromatography to give 33.6 mg (68%) as a yellow solid. mp 96–98 °C.  $^1\text{H}$  NMR ( $\text{CDCl}_3$ , 500 MHz)  $\delta$  = 7.79 (d,  $J$  = 9.0 Hz, 2H), 7.41-7.47 (m, 3H), 6.74 (s, 1H), 4.23 (t,  $J$  = 11.5 Hz, 1H), 2.11-2.16 (m, 1H), 1.69 (t,  $J$  = 14.5 Hz, 1H), 1.43 (s, 3H), 1.31 (s, 6H), 1.19 (s, 3H).  $^{13}\text{C}$  NMR ( $\text{CDCl}_3$ , 125 MHz)  $\delta$  = 150.9, 129.9, 128.4, 128.3, 128.2, 76.1, 71.9, 42.8, 38.6, 27.8, 27.0, 26.5, 21.8. HRMS (ESI)  $m/z$  calcd for  $\text{C}_{15}\text{H}_{22}\text{NO}_2^+$  ( $\text{M}+\text{H}$ ) $^+$  248.1645, found 248.1662.

**7-(2-hydroxypropan-2-yl)-5-phenyl-6-azaspiro[3.4]oct-5-ene 6-oxide (2m)**

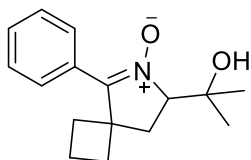

The product was purified by flash chromatography to give 39.4 mg (76%) as a yellow solid. mp 101–103 °C. <sup>1</sup>H NMR (CDCl<sub>3</sub>, 500 MHz) δ = 7.84 (d, *J* = 9.0 Hz, 2H), 7.43–7.52 (m, 3H), 6.65 (s, 1H), 4.16 (t, *J* = 10.5 Hz, 1H), 2.53–2.70 (m, 3H), 2.14–2.22 (m, 1H), 1.92–2.12 (m, 3H), 1.83–1.91 (m, 1H), 1.27 (s, 3H), 1.22 (s, 3H). <sup>13</sup>C NMR (CDCl<sub>3</sub>, 125 MHz) δ = 149.1, 130.0, 128.6, 128.3, 76.5, 71.9, 48.2, 38.2, 33.5, 32.5, 26.6, 21.9, 15.7. HRMS (ESI) *m/z* calcd for C<sub>16</sub>H<sub>22</sub>NO<sub>2</sub><sup>+</sup> (M+H)<sup>+</sup> 260.1645, found 260.1649.

**2-(3-hydroxypentan-3-yl)-4,4-dimethyl-5-phenyl-3,4-dihydro-2H-pyrrole 1-oxide (2n)**

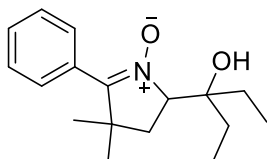

The product was purified by flash chromatography to give 40.7 mg (74%) as a yellow solid. mp 98–100 °C. <sup>1</sup>H NMR (CDCl<sub>3</sub>, 500 MHz) δ = 7.76 (d, *J* = 9.0 Hz, 2H), 7.42–7.51 (m, 3H), 6.40 (s, 1H), 4.40 (t, *J* = 11.5 Hz, 1H), 2.07–2.12 (m, 1H), 2.04 (s, 1H), 1.66–1.81 (m, 3H), 1.47–1.54 (m, 1H), 1.42 (s, 3H), 1.32 (s, 3H). <sup>13</sup>C NMR (CDCl<sub>3</sub>, 125 MHz) δ = 131.5, 130.0, 129.9, 128.5, 128.4, 74.9, 74.0, 43.0, 37.7, 28.6, 27.8, 27.3, 26.1, 7.5, 7.1. HRMS (ESI) *m/z* calcd for C<sub>17</sub>H<sub>26</sub>NO<sub>2</sub><sup>+</sup> (M+H)<sup>+</sup> 276.1958, found 276.1967.

**2-(1-hydroxycyclohexyl)-4,4-dimethyl-5-phenyl-3,4-dihydro-2H-pyrrole 1-oxide (2o)**

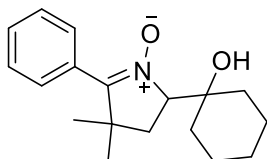

The product was purified by flash chromatography to give 40.8 mg (71%) as a yellow solid. mp 115–117 °C. <sup>1</sup>H NMR (CDCl<sub>3</sub>, 500 MHz) δ = 7.75 (d, *J* = 7.5 Hz, 2H), 7.39–7.46 (m, 3H), 6.46 (s, 1H), 4.21 (t, *J* = 9.5 Hz, 1H), 2.07–2.11 (m, 1H), 1.71–1.86 (m, 6H), 1.51–1.61 (m, 3H), 1.42 (s, 3H), 1.31 (s, 3H), 1.11–1.20 (m, 3H). <sup>13</sup>C NMR (CDCl<sub>3</sub>, 125 MHz) δ = 151.0, 129.9, 128.5, 128.4, 128.2, 76.4, 72.7, 42.9, 38.0, 34.3, 28.6, 27.8, 27.1, 26.0, 20.8, 20.4. HRMS (ESI) *m/z* calcd for C<sub>18</sub>H<sub>26</sub>NO<sub>2</sub><sup>+</sup> (M+H)<sup>+</sup> 288.1958, found 288.1964.

**2-(1-hydroxycycloheptyl)-4,4-dimethyl-5-phenyl-3,4-dihydro-2H-pyrrole 1-oxide (2p)**

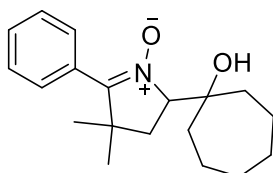

The product was purified by flash chromatography to give 39.7 mg (66%) as a yellow solid. mp 124–126 °C. <sup>1</sup>H NMR (CDCl<sub>3</sub>, 500 MHz) δ = 7.75 (s, 2H), 7.45 (d, *J* = 8.5 Hz, 3H), 6.68 (s, 1H), 4.22 (t, *J* = 10.0 Hz, 1H), 2.09–2.13 (m, 1H), 1.80–1.88 (m, 4H), 1.48–1.72 (m, 9H), 1.41 (s, 3H), 1.32 (s, 3H). <sup>13</sup>C NMR (CDCl<sub>3</sub>, 125 MHz) δ = 151.2, 129.9, 128.5, 128.4, 128.2, 77.4, 75.4, 42.8, 38.9, 38.0, 32.8, 28.8, 28.8, 27.8, 26.9, 22.1, 21.5. HRMS (ESI) *m/z* calcd for C<sub>19</sub>H<sub>28</sub>NO<sub>2</sub><sup>+</sup> (M+H)<sup>+</sup> 302.2115, found 302.2115.

**2-((1*r*,3*r*,5*r*,7*r*)-2-hydroxyadamantan-2-yl)-4,4-dimethyl-5-phenyl-3,4-dihydro-2H-pyrrole 1-oxide (2q)**

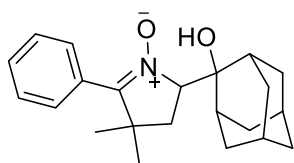

The product was purified by flash chromatography to give 32.5 mg (48%) as a yellow solid. mp 157–159 °C. <sup>1</sup>H NMR (CDCl<sub>3</sub>, 500 MHz) δ = 7.77 (d, *J* = 9.0 Hz, 2H), 7.42 (d, *J* = 9.5 Hz, 3H), 4.80-4.84 (m, 1H), 3.30 (s, 1H), 3.10 (s, 1H), 2.33 (d, *J* = 12.5 Hz, 2H), 2.16 (t, *J* = 14.5 Hz, 1H), 2.06 (d, *J* = 17.0 Hz, 1H), 1.87-1.96 (m, 3H), 1.74-1.81 (m, 4H), 1.53-1.62 (m, 4H), 1.42 (s, 3H), 1.30 (s, 3H). <sup>13</sup>C NMR (CDCl<sub>3</sub>, 125 MHz) δ = 151.3, 129.6, 128.3, 127.7, 127.4, 74.4, 71.2, 42.0, 38.0, 37.4, 35.6, 34.9, 34.1, 34.1, 33.0, 32.5, 27.4, 26.9, 26.7, 25.3. HRMS (ESI) *m/z* calcd for C<sub>22</sub>H<sub>30</sub>NO<sub>2</sub><sup>+</sup> (M+H)<sup>+</sup> 340.2271, found 340.2294.

**2-(1-hydroxy-1-phenylethyl)-4,4-dimethyl-5-phenyl-3,4-dihydro-2H-pyrrole 1-oxide (2r)**

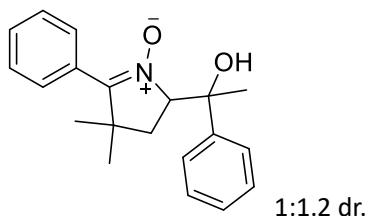

The product was purified by flash chromatography to give 19.2 mg (31%) as a yellow solid. mp 122–124 °C. <sup>1</sup>H NMR (CDCl<sub>3</sub>, 500 MHz) δ = 7.82 (d, *J* = 7.5 Hz, 2H), 7.57 (d, *J* = 8.0 Hz, 2H), 7.37-7.50 (m, 6H), 7.32 (t, *J* = 7.0 Hz, 1H), 4.40 (t, *J* = 8.5 Hz, 1H), 1.76 (s, 3H), 1.62-1.68 (m, 2H), 1.32 (s, 3H), 1.30 (s, 3H). <sup>13</sup>C NMR (CDCl<sub>3</sub>, 125 MHz) δ = 151.7, 143.4, 130.1, 128.5, 128.4, 128.3, 128.1, 127.7, 126.1, 76.5, 75.3, 42.6, 38.8, 27.8, 27.0, 19.7. HRMS (ESI) *m/z* calcd for C<sub>20</sub>H<sub>24</sub>NO<sub>2</sub><sup>+</sup> (M+H)<sup>+</sup> 310.1802, found 310.1814.

The product was purified by flash chromatography to give 23.5mg (38%) as a yellow solid. mp 120–122 °C. <sup>1</sup>H NMR (CDCl<sub>3</sub>, 500 MHz) δ = 8.32 (s, 1H), 7.60 (d, *J* = 8.0 Hz, 2H), 7.36-7.42 (m, 6H), 7.30 (t, *J* = 7.0 Hz, 1H), 4.47 (t, *J* = 9.0 Hz, 1H), 2.11-2.16 (m, 1H), 1.72-1.76 (m, 1H), 1.68 (s, 3H), 1.25 (s, 3H), 0.49 (s, 3H). <sup>13</sup>C NMR (CDCl<sub>3</sub>, 125 MHz) δ = 152.7, 141.9, 129.9, 128.5, 128.1, 128.1, 128.0, 127.7, 127.2, 76.5, 76.2, 43.1, 36.3, 28.5, 26.8, 25.8.

**2-(2-hydroxy-4-methylpentan-2-yl)-4,4-dimethyl-5-phenyl-3,4-dihydro-2H-pyrrole 1-oxide (2s)**

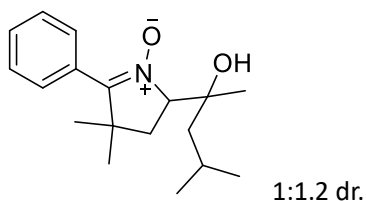

The product was purified by flash chromatography to give 19.1 mg (33%) as a yellow solid. mp 128–130 °C. <sup>1</sup>H NMR (CDCl<sub>3</sub>, 500 MHz) δ = 7.78 (d, *J* = 7.5 Hz, 2H), 7.41-7.48 (m, 3H), 6.40 (s, 1H), 4.22 (t, *J* = 10.0 Hz, 1H), 2.09-2.13 (m, 1H), 1.97-2.02 (m, 1H), 1.74 (t, *J* = 12.5 Hz, 1H), 1.53-1.57 (m, 1H), 1.41 (s, 3H), 1.35-1.38 (m, 1H), 1.33 (s, 3H), 1.17 (s, 3H), 1.07 (d, *J* = 6.5 Hz, 3H), 0.98 (d, *J* = 6.5 Hz, 3H). <sup>13</sup>C NMR (CDCl<sub>3</sub>, 125 MHz) δ = 151.1, 129.9, 128.5, 128.4, 128.2, 77.3, 73.9, 42.8, 41.2, 38.1, 27.8, 27.0, 25.3, 24.6, 24.0, 23.6. HRMS (ESI) *m/z* calcd for C<sub>18</sub>H<sub>28</sub>NO<sub>2</sub><sup>+</sup> (M+H)<sup>+</sup> 290.2115, found 290.2120.



The product was purified by flash chromatography to give 23.1 mg (40%) as a yellow solid. mp 126–128 °C.  $^1\text{H}$  NMR ( $\text{CDCl}_3$ , 500 MHz)  $\delta$  = 7.76 (d,  $J$  = 7.5 Hz, 2H), 7.42–7.47 (m, 3H), 6.75 (s, 1H), 4.31 (t,  $J$  = 9.0 Hz, 1H), 2.10–2.14 (m, 1H), 1.94–1.99 (m, 1H), 1.69 (t,  $J$  = 11.0 Hz, 2H), 1.42 (s, 3H), 1.31 (s, 3H), 1.29 (s, 3H), 1.25 (s, 1H), 1.05 (d,  $J$  = 6.5 Hz, 3H), 1.00 (d,  $J$  = 6.5 Hz, 3H).  $^{13}\text{C}$  NMR ( $\text{CDCl}_3$ , 125 MHz)  $\delta$  = 151.2, 129.9, 128.5, 128.3, 128.2, 75.2, 74.4, 47.7, 42.8, 38.7, 27.8, 27.2, 25.0, 24.7, 23.5, 21.1.

**2-(2-hydroxy-6,10,14-trimethylpentadecan-2-yl)-4,4-dimethyl-5-phenyl-3,4-dihydro-2H-pyrrole 1-oxide (2t)**

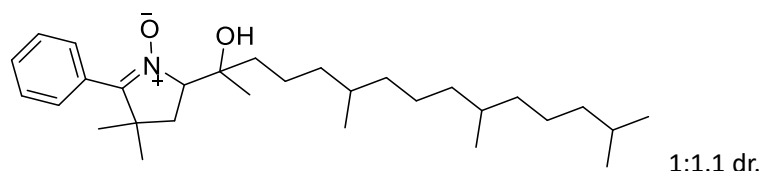

The product was purified by flash chromatography to give 28.3 mg (31%) as a yellow solid. mp 143–145 °C.  $^1\text{H}$  NMR ( $\text{CDCl}_3$ , 500 MHz)  $\delta$  = 7.80 (d,  $J$  = 8.5 Hz, 2H), 7.46 (t,  $J$  = 10.0 Hz, 3H), 6.79 (s, 1H), 4.29 (t,  $J$  = 11.0 Hz, 1H), 2.11–2.16 (m, 1H), 1.71 (t,  $J$  = 15.0 Hz, 1H), 1.56–1.63 (m, 1H), 1.53 (t,  $J$  = 8.0 Hz, 1H), 1.40–1.45 (m, 8H), 1.28–1.33 (m, 15H), 1.10–1.16 (m, 6H), 0.86–0.89 (m, 12H).  $^{13}\text{C}$  NMR ( $\text{CDCl}_3$ , 125 MHz)  $\delta$  = 151.1, 129.9, 128.4, 128.3, 128.1, 76.6, 73.4, 42.8, 39.3, 38.0, 37.7, 37.7, 37.4, 37.4, 37.3, 37.2, 33.7, 33.0, 32.9, 32.7, 27.9, 27.7, 27.0, 24.7, 24.4, 23.6, 22.7, 22.6, 20.3, 20.3, 19.8, 19.7. HRMS (ESI)  $m/z$  calcd for  $\text{C}_{30}\text{H}_{52}\text{NO}_2^+$  ( $\text{M}+\text{H}$ ) $^+$  458.3993, found 458.3997.

The product was purified by flash chromatography to give 31.1 mg (34%) as a yellow oil.  $^1\text{H}$  NMR ( $\text{CDCl}_3$ , 500 MHz)  $\delta$  = 7.77 (d,  $J$  = 7.5 Hz, 2H), 7.41–7.47 (m, 3H), 6.77 (s, 1H), 4.27 (t,  $J$  = 9.0 Hz, 1H), 2.09–2.13 (m, 1H), 1.69 (t,  $J$  = 11.0 Hz, 1H), 1.52 (d,  $J$  = 6.5 Hz, 1H), 1.36–1.42 (m, 8H), 1.25–1.31 (m, 15H), 1.11–1.15 (m, 3H), 1.05–1.09 (m, 3H), 0.83–0.88 (m, 12H).  $^{13}\text{C}$  NMR ( $\text{CDCl}_3$ , 125 MHz)  $\delta$  = 151.0, 129.9, 128.4, 128.3, 128.1, 75.0, 75.0, 73.7, 42.9, 39.8, 39.3, 38.4, 37.5, 37.4, 37.3, 37.3, 37.2, 32.8, 32.7, 27.9, 27.7, 27.1, 24.7, 24.4, 22.7, 22.6, 20.4, 20.3, 19.9, 19.9, 19.7, 19.7, 19.6.

**2-(2-hydroxy-6-methylhept-5-en-2-yl)-5-phenyl-3,4-dihydro-2H-pyrrole 1-oxide (2u)**

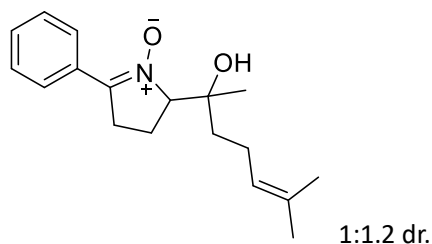

The product was purified by flash chromatography to give 18.9 mg (33%) as a yellow solid. mp 133–135 °C.  $^1\text{H}$  NMR ( $\text{CDCl}_3$ , 500 MHz)  $\delta$  = 8.32–8.34 (m, 2H), 7.45–7.47 (m, 3H), 6.69 (s, 1H), 5.10–5.14 (m, 1H), 4.33 (t,  $J$  = 9.5 Hz, 1H), 2.08–2.12 (m, 2H), 2.29–2.36 (m, 1H), 2.20–2.27 (m, 1H), 2.11–2.19 (m, 1H), 1.80–1.89 (m, 1H), 1.69 (s, 3H), 1.64 (s, 3H), 1.46–1.52 (m, 2H), 1.20 (s, 3H).  $^{13}\text{C}$  NMR ( $\text{CDCl}_3$ , 125 MHz)  $\delta$  = 142.2, 131.9, 130.9, 128.6, 128.5, 127.7, 124.2, 79.0, 74.1, 39.5, 28.9, 25.7, 21.3, 20.7, 19.3, 17.7. HRMS (ESI)  $m/z$  calcd for  $\text{C}_{18}\text{H}_{26}\text{NO}_2^+$  ( $\text{M}+\text{H}$ ) $^+$  288.1958, found 288.1972.

The product was purified by flash chromatography to give 23.0 mg (40%) as a yellow solid. mp 131–133 °C.  $^1\text{H}$  NMR ( $\text{CDCl}_3$ , 500 MHz)  $\delta$  = 8.32 (s, 2H), 7.46 (s, 3H), 6.41 (s, 1H), 5.07 (t,  $J$  =

6.5 Hz, 1H), 4.31 (t,  $J = 8.5$  Hz, 1H), 3.10 (t,  $J = 7.0$  Hz, 1H), 2.28-2.37 (m, 2H), 2.06-2.11 (m, 1H), 1.87-1.94 (m, 1H), 1.63 (s, 3H), 1.58 (s, 3H), 1.50-1.55 (m, 1H), 1.35-1.41 (m, 1H), 1.19 (s, 3H).  $^{13}\text{C}$  NMR ( $\text{CDCl}_3$ , 125 MHz)  $\delta = 142.4, 131.6, 130.9, 128.6, 128.5, 127.8, 124.5, 80.9, 74.1, 33.7, 28.8, 25.6, 23.6, 21.5, 19.0, 17.6$ .

### (C) NMR Spectra of 2

#### 2-(2-hydroxypropan-2-yl)-5-phenyl-3,4-dihydro-2H-pyrrole 1-oxide (2a)

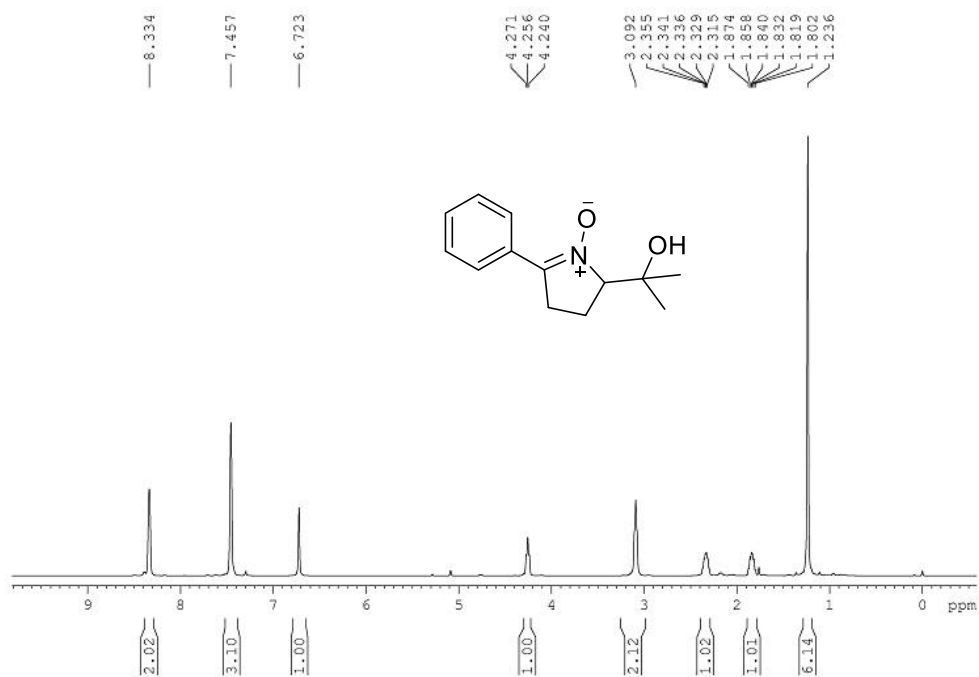

<sup>1</sup>H NMR (500 MHz, CDCl<sub>3</sub>)

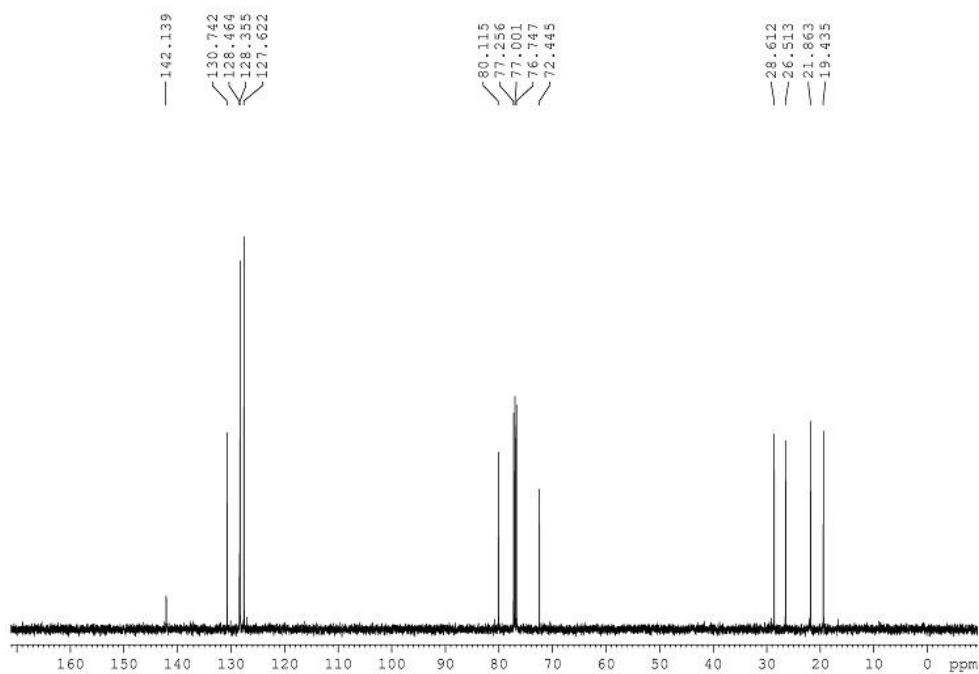

<sup>13</sup>C NMR (125 MHz, CDCl<sub>3</sub>)

2-(2-hydroxypropan-2-yl)-5-(p-tolyl)-3,4-dihydro-2H-pyrrole 1-oxide (2b)

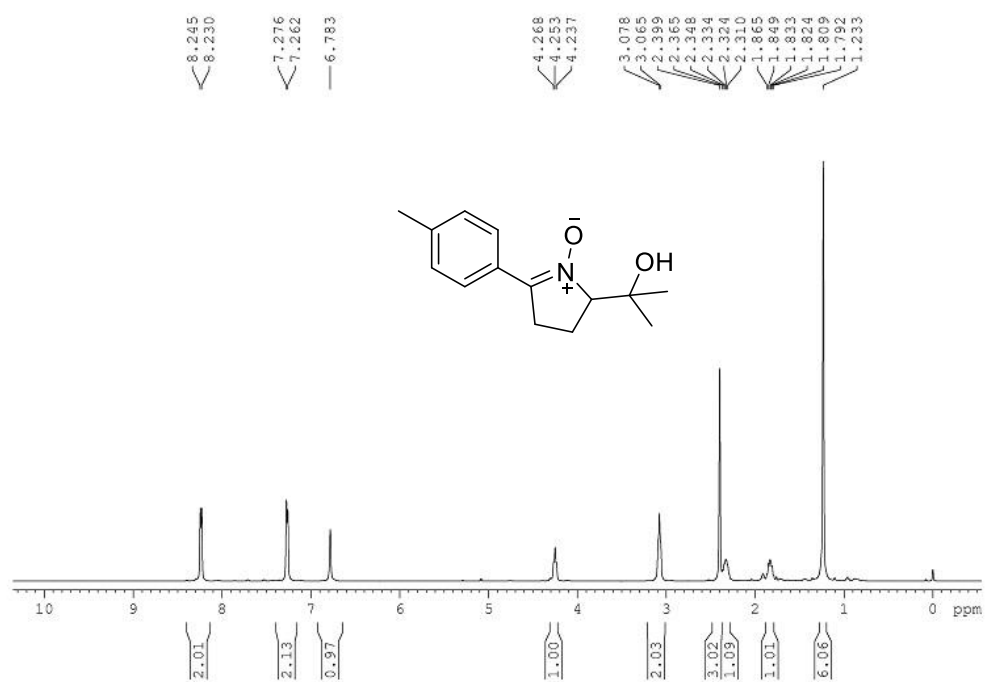

<sup>1</sup>H NMR (500 MHz, CDCl<sub>3</sub>)

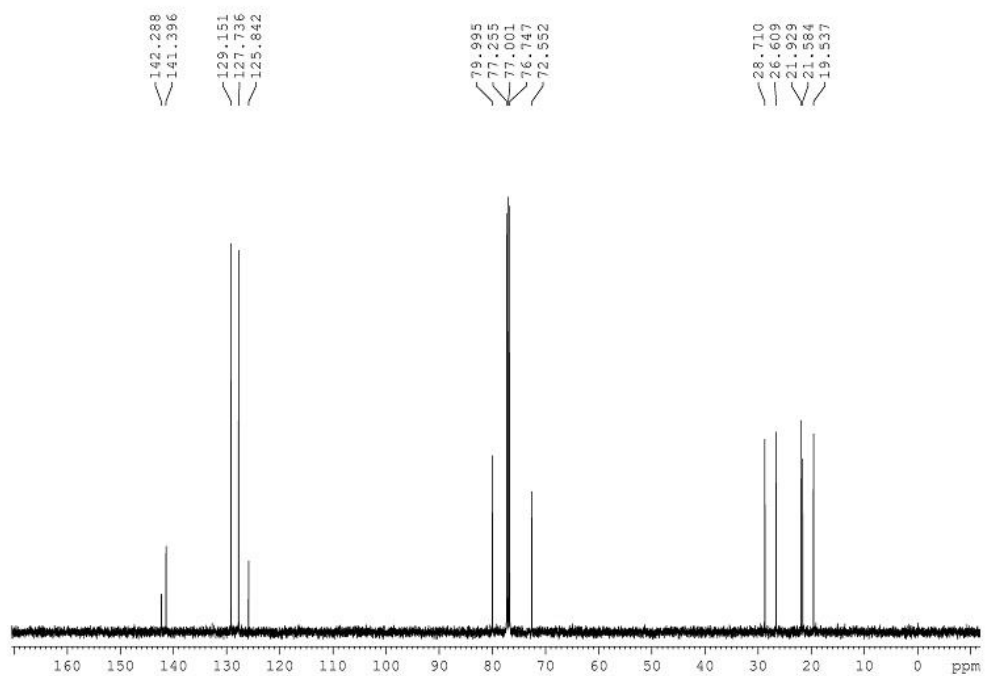

<sup>13</sup>C NMR (125 MHz, CDCl<sub>3</sub>)

5-(4-(tert-butyl)phenyl)-2-(2-hydroxypropan-2-yl)-3,4-dihydro-2H-pyrrole 1-oxide (2c)

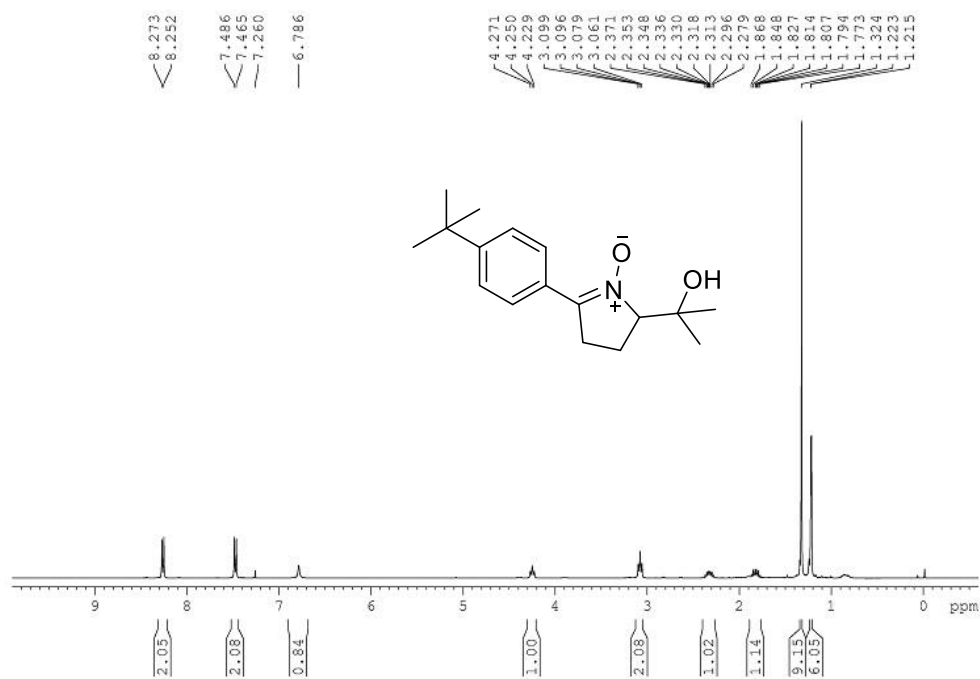

<sup>1</sup>H NMR (500 MHz, CDCl<sub>3</sub>)

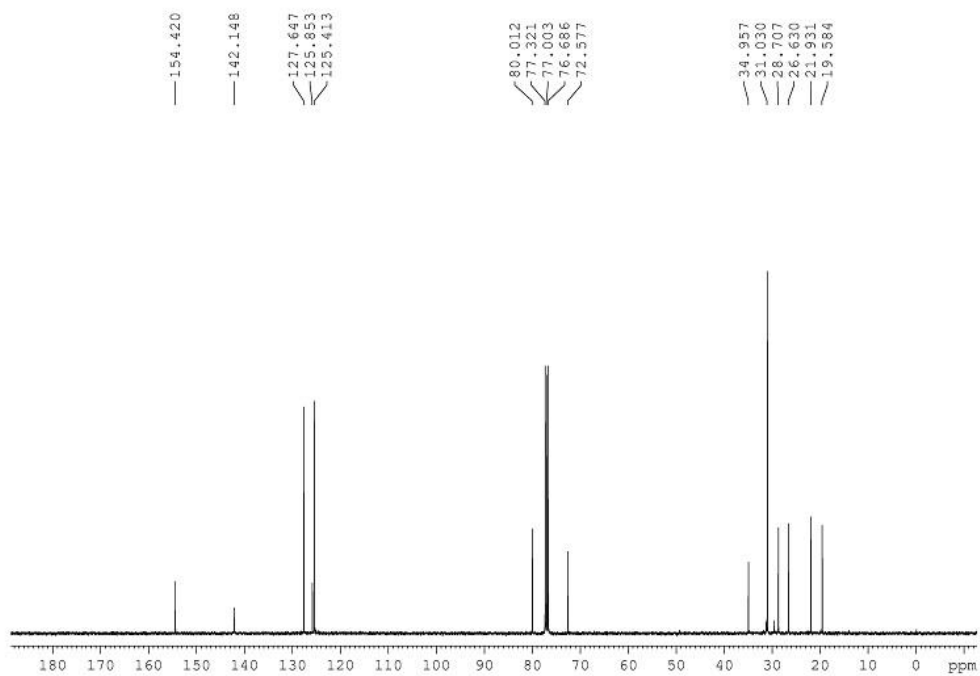

<sup>13</sup>C NMR (125 MHz, CDCl<sub>3</sub>)

2-(2-hydroxypropan-2-yl)-5-(4-methoxyphenyl)-3,4-dihydro-2H-pyrrole 1-oxide (2d)

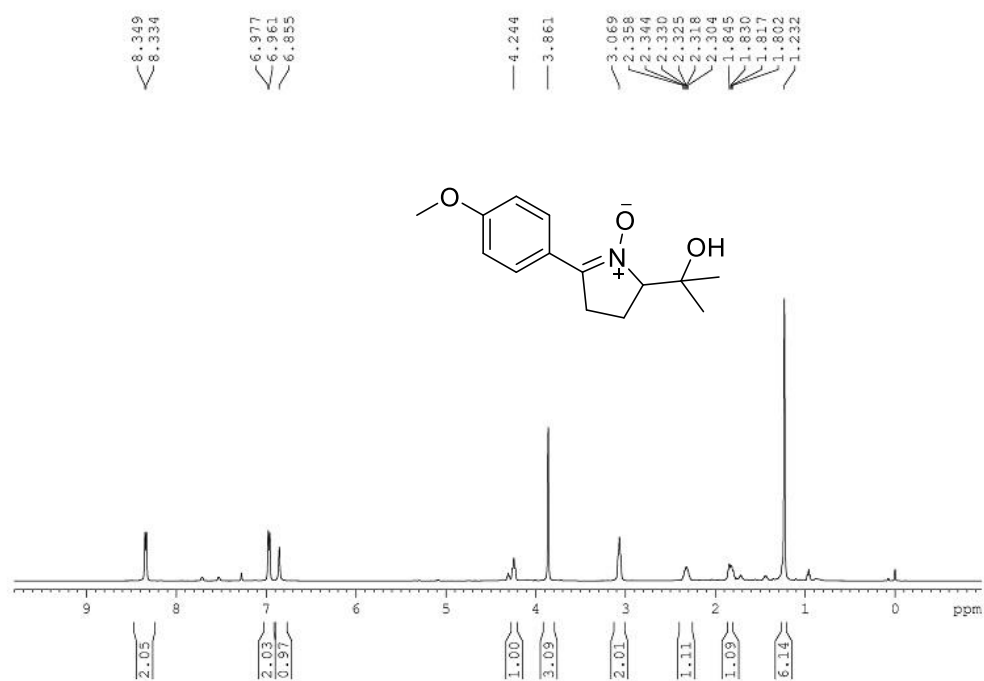

<sup>1</sup>H NMR (500 MHz, CDCl<sub>3</sub>)

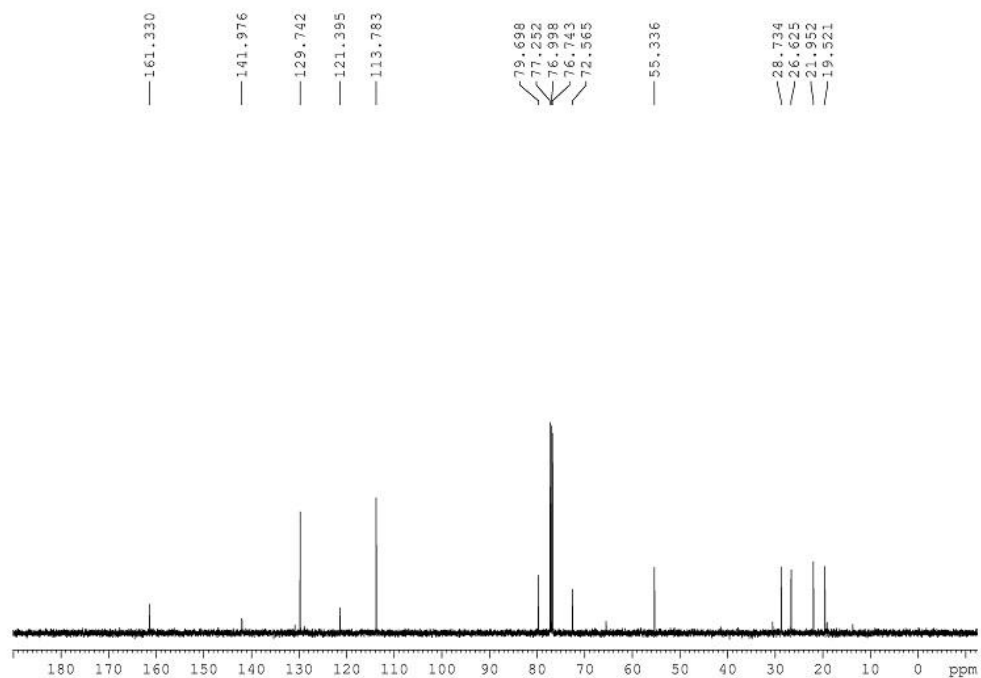

<sup>13</sup>C NMR (125 MHz, CDCl<sub>3</sub>)

5-(4-fluorophenyl)-2-(2-hydroxypropan-2-yl)-3,4-dihydro-2H-pyrrole 1-oxide (2e)

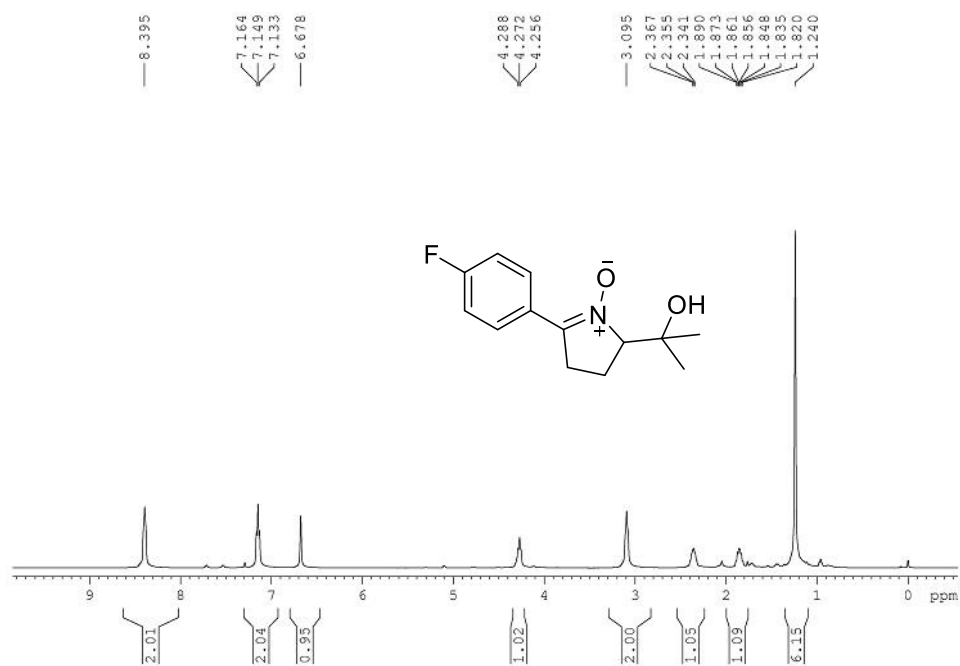

<sup>1</sup>H NMR (500 MHz, CDCl<sub>3</sub>)

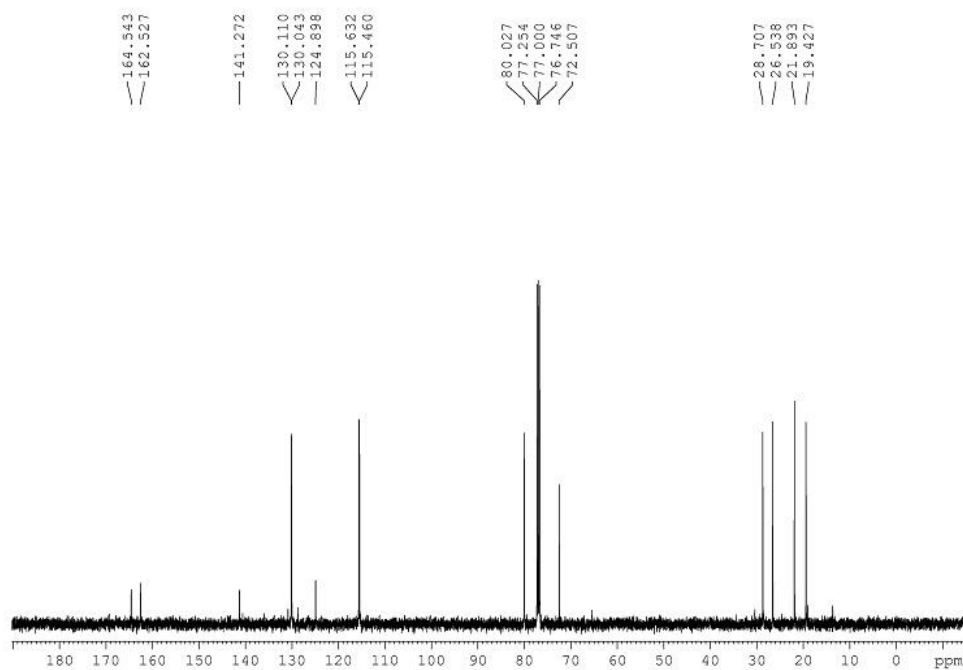

<sup>13</sup>C NMR (125 MHz, CDCl<sub>3</sub>)

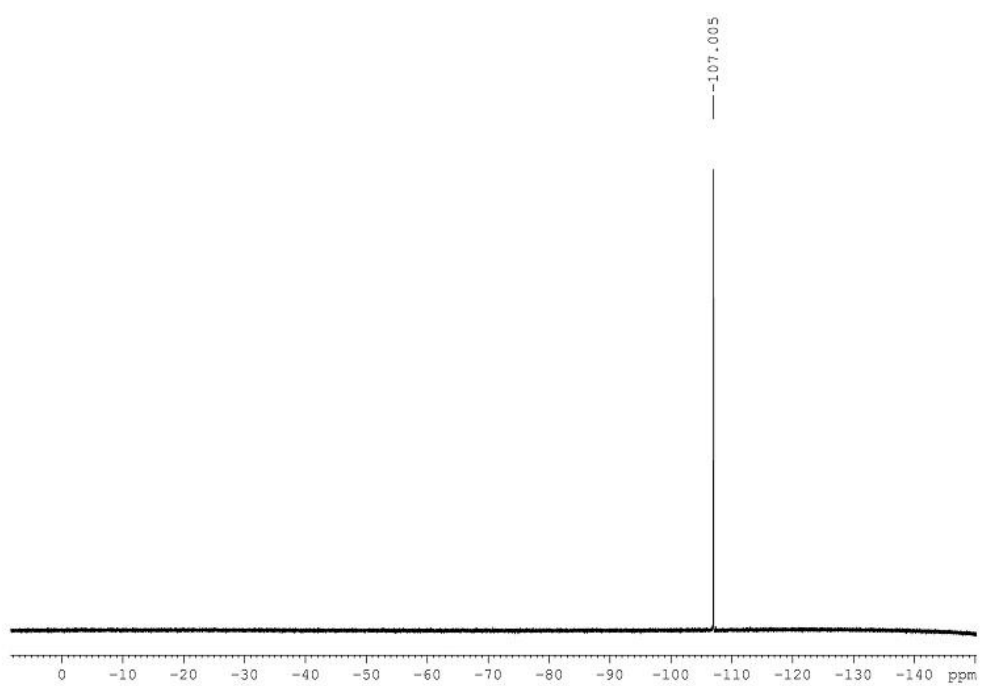

$^{19}\text{F}$  NMR (471 MHz,  $\text{CDCl}_3$ )



5-(4-chlorophenyl)-2-(2-hydroxypropan-2-yl)-3,4-dihydro-2H-pyrrole 1-oxide (2f)

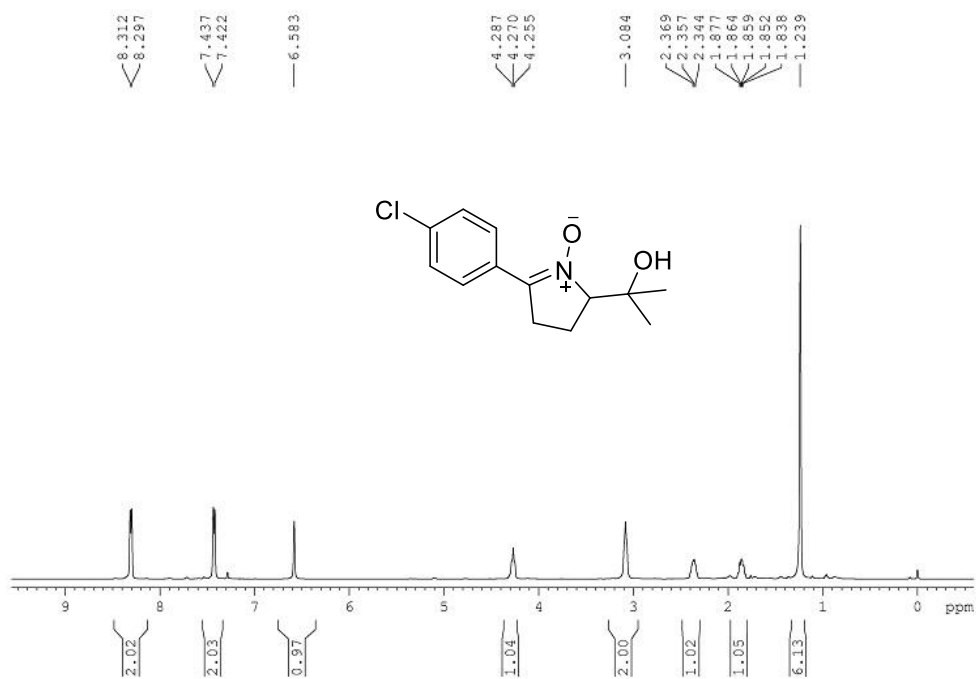

$^1\text{H}$  NMR (500 MHz,  $\text{CDCl}_3$ )

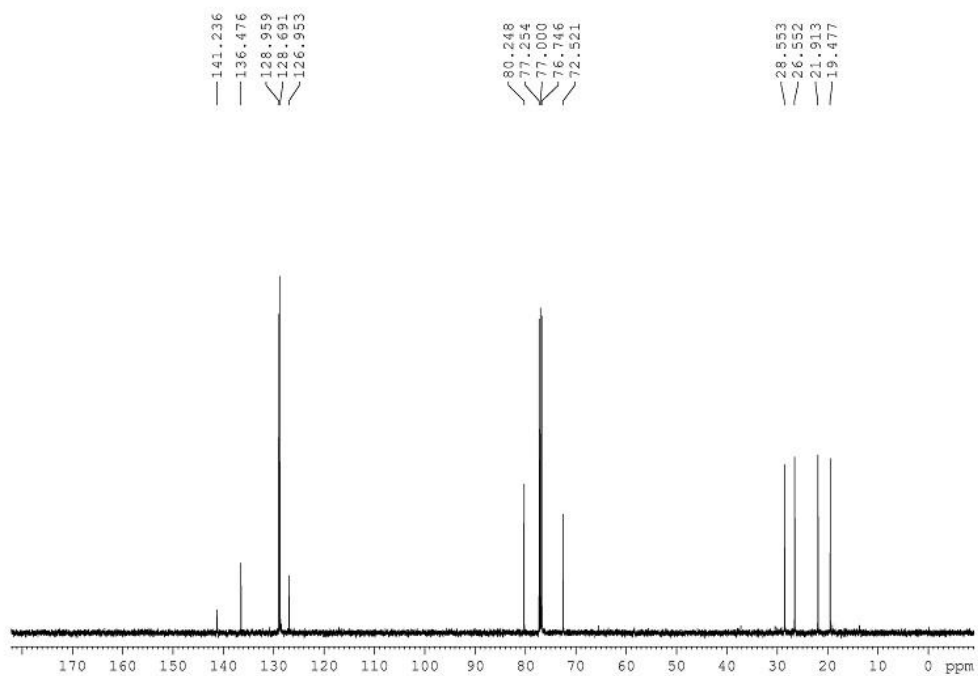

$^{13}\text{C}$  NMR (125 MHz,  $\text{CDCl}_3$ )

2-(2-hydroxypropan-2-yl)-5-(4-(trifluoromethyl)phenyl)-3,4-dihydro-2H-pyrrole 1-oxide (2g)

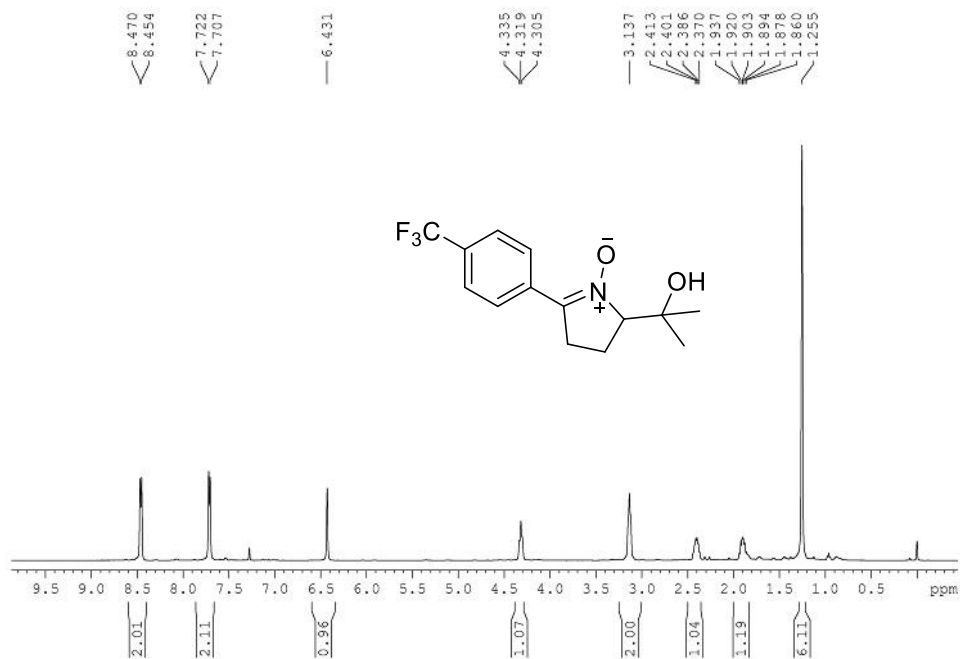

<sup>1</sup>H NMR (500 MHz, CDCl<sub>3</sub>)

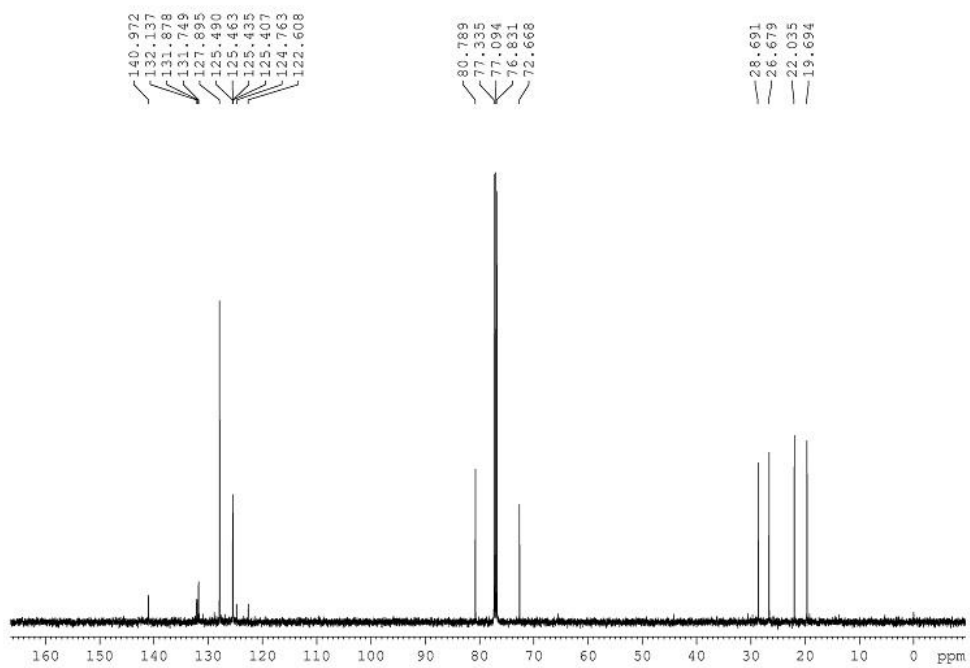

<sup>13</sup>C NMR (125 MHz, CDCl<sub>3</sub>)

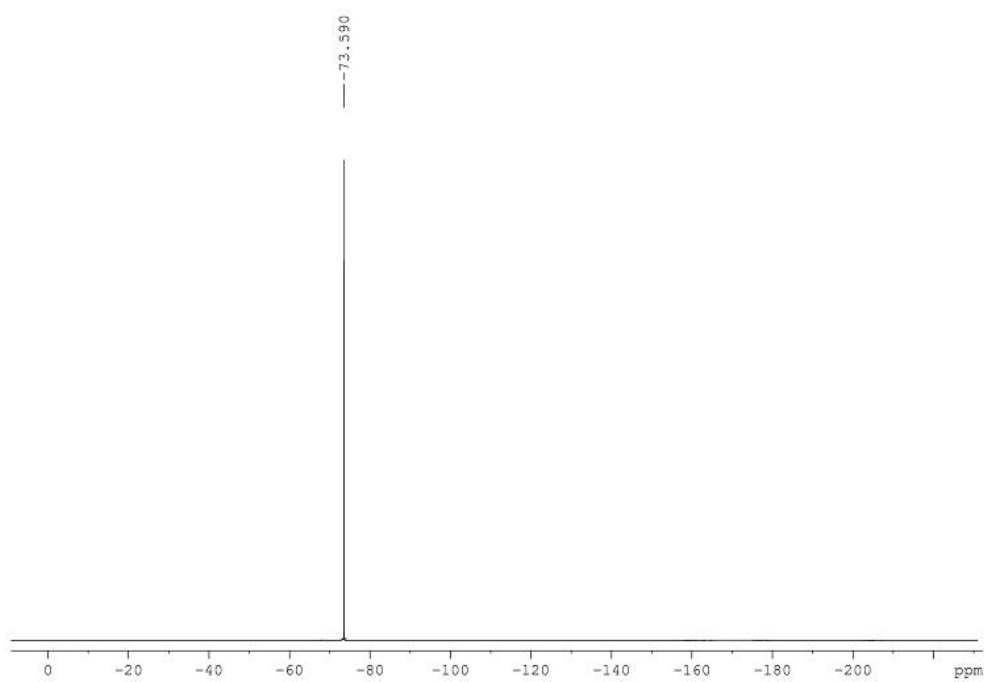

$^{19}\text{F}$  NMR (471 MHz,  $\text{CDCl}_3$ )

2-(2-hydroxypropan-2-yl)-5-(m-tolyl)-3,4-dihydro-2H-pyrrole 1-oxide (2h)

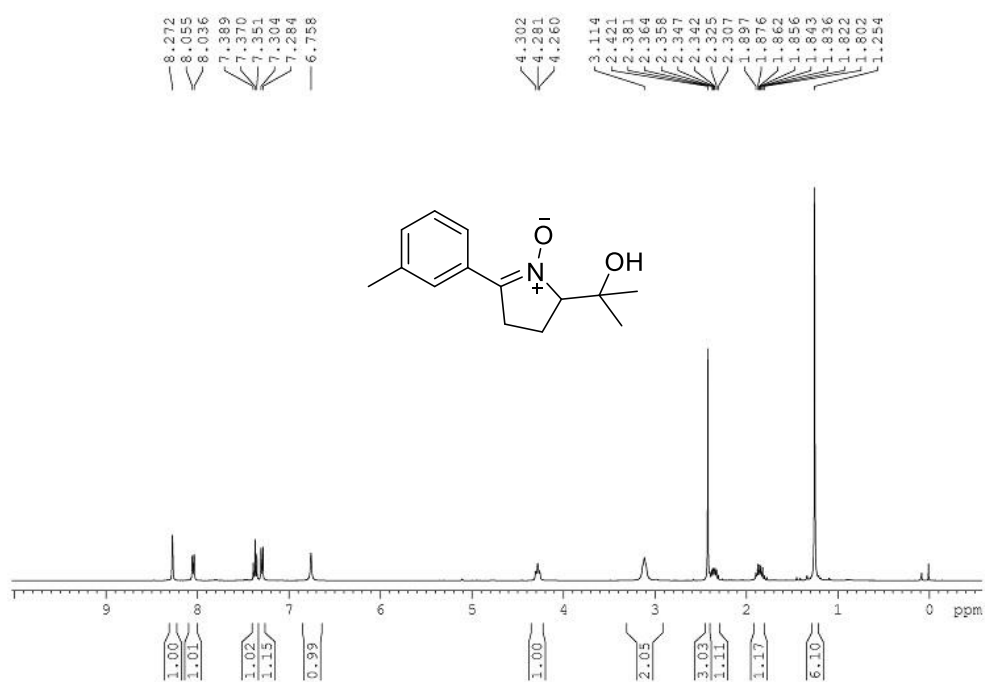

<sup>1</sup>H NMR (500 MHz, CDCl<sub>3</sub>)

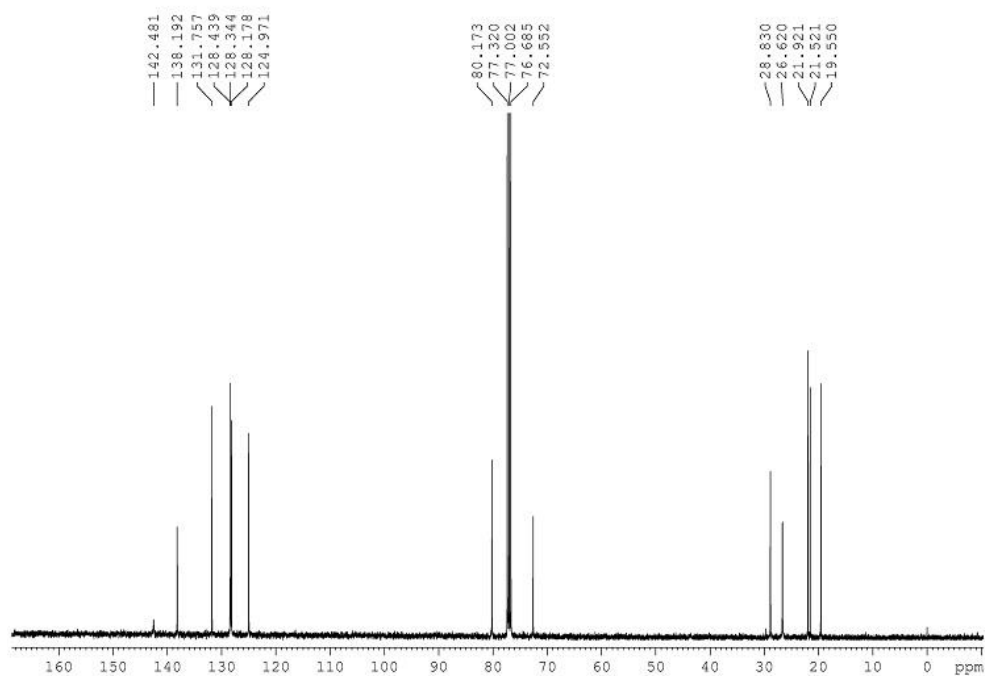

<sup>13</sup>C NMR (125 MHz, CDCl<sub>3</sub>)

2-(2-hydroxypropan-2-yl)-5-(3-methoxyphenyl)-3,4-dihydro-2H-pyrrole 1-oxide (2i)

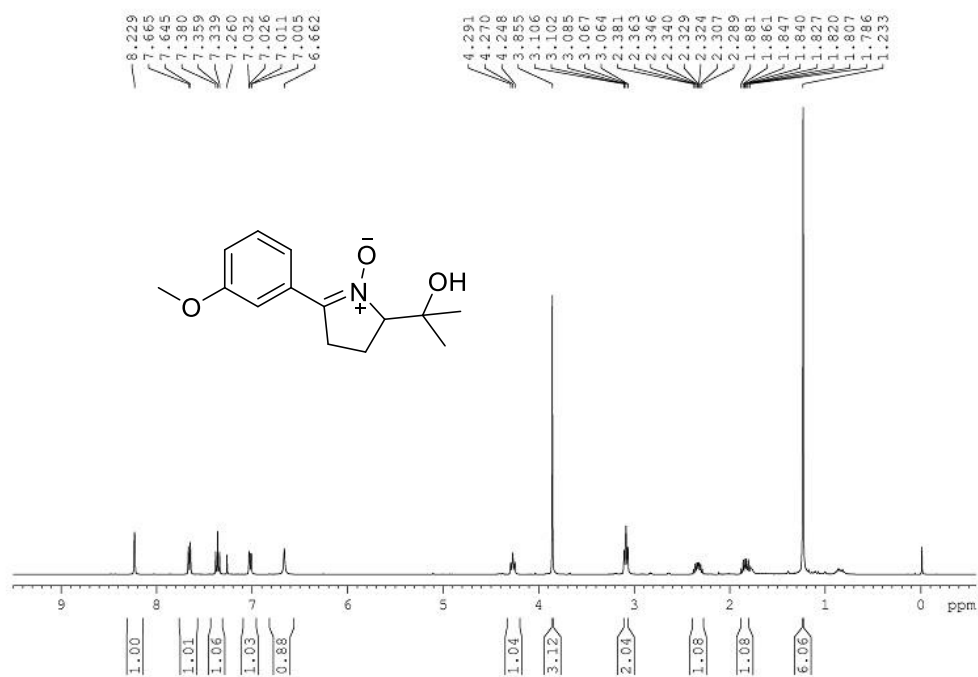

$^1\text{H}$  NMR (500 MHz,  $\text{CDCl}_3$ )

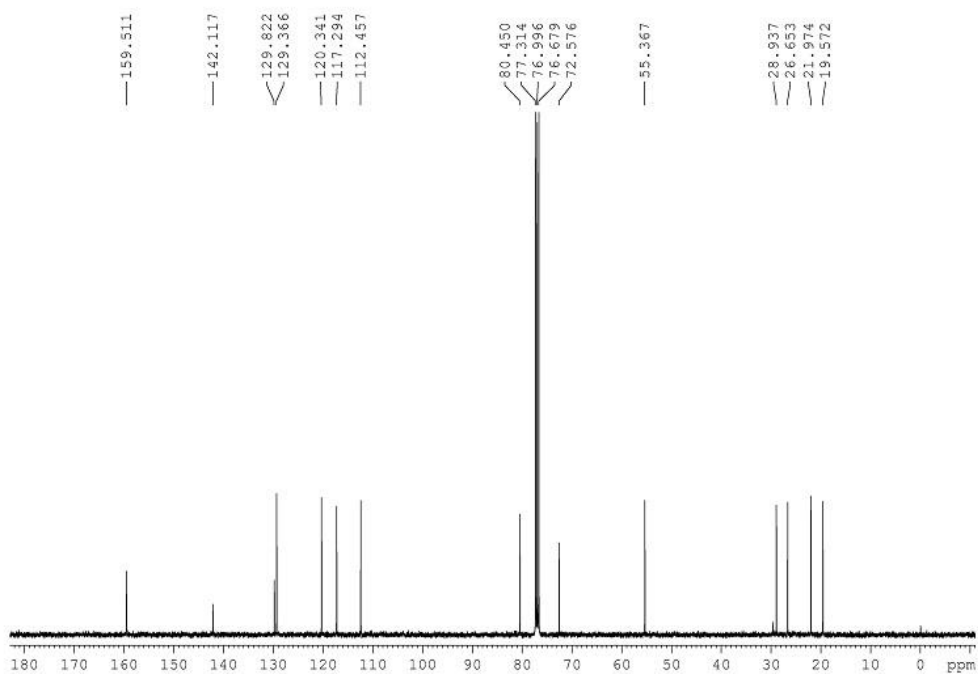

$^{13}\text{C}$  NMR (125 MHz,  $\text{CDCl}_3$ )

5-(3-chlorophenyl)-2-(2-hydroxypropan-2-yl)-3,4-dihydro-2H-pyrrole 1-oxide (2j)

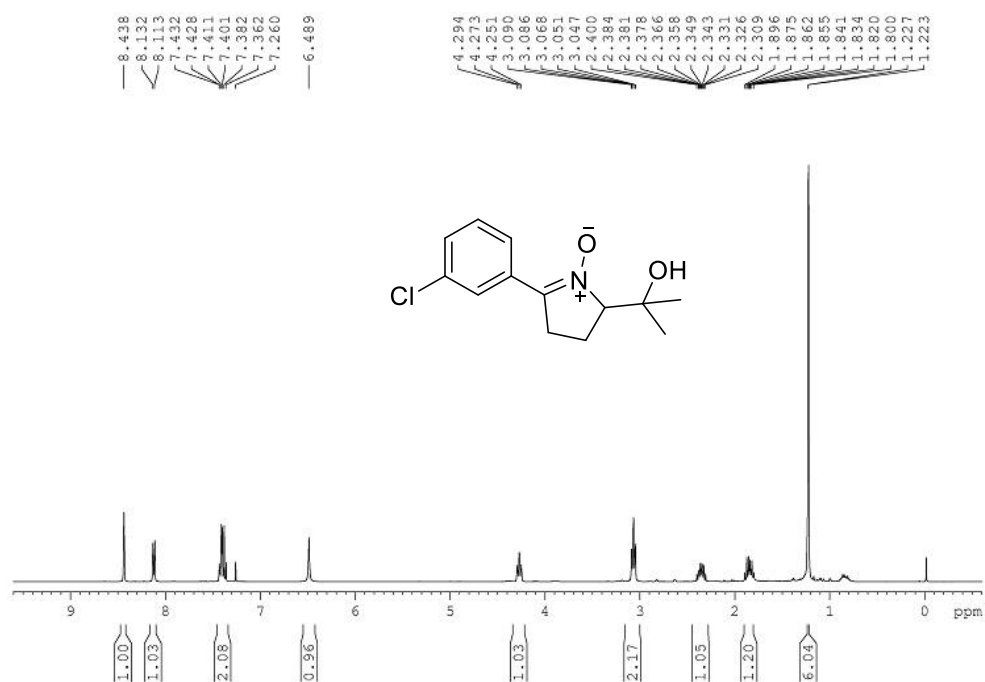

<sup>1</sup>H NMR (500 MHz, CDCl<sub>3</sub>)

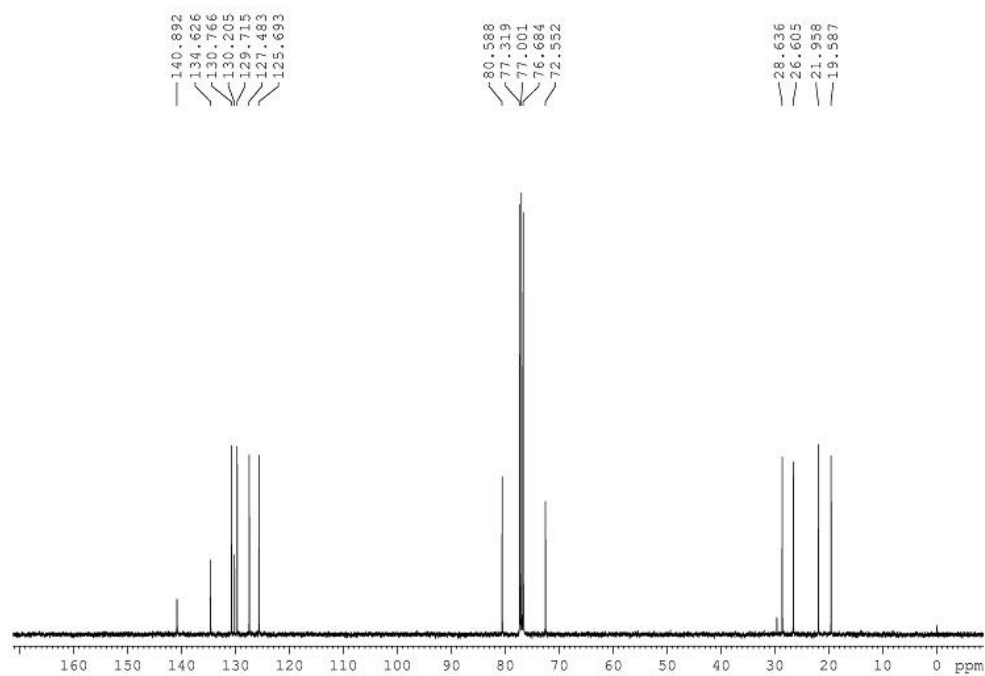

<sup>13</sup>C NMR (125 MHz, CDCl<sub>3</sub>)

2-(2-hydroxypropan-2-yl)-4,4-dimethyl-5-(thiophen-2-yl)-3,4-dihydro-2H-pyrrole 1-oxide (2k)

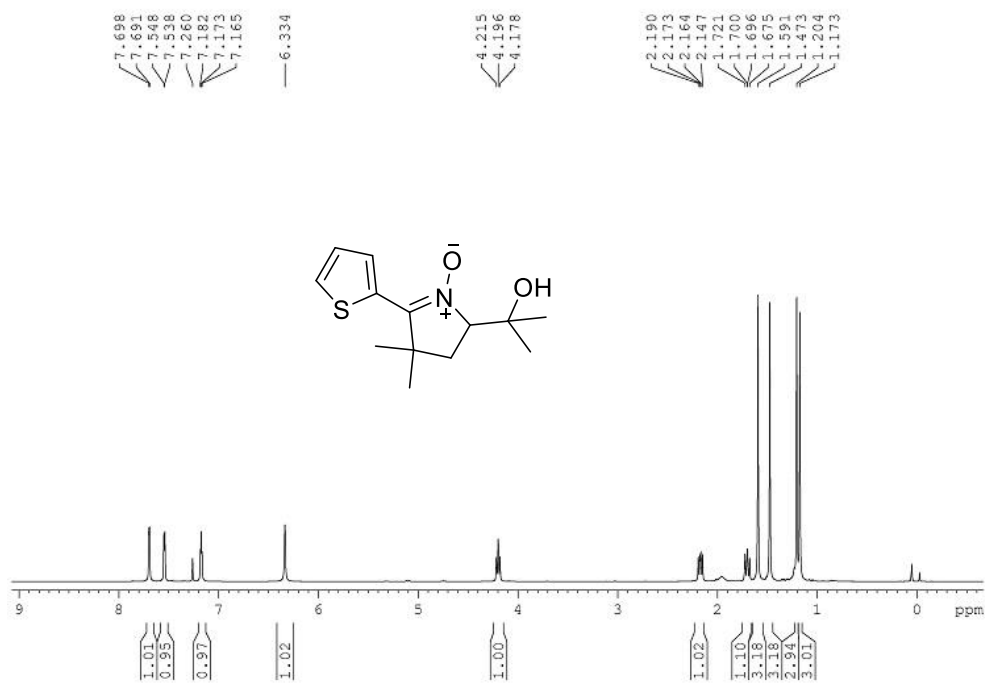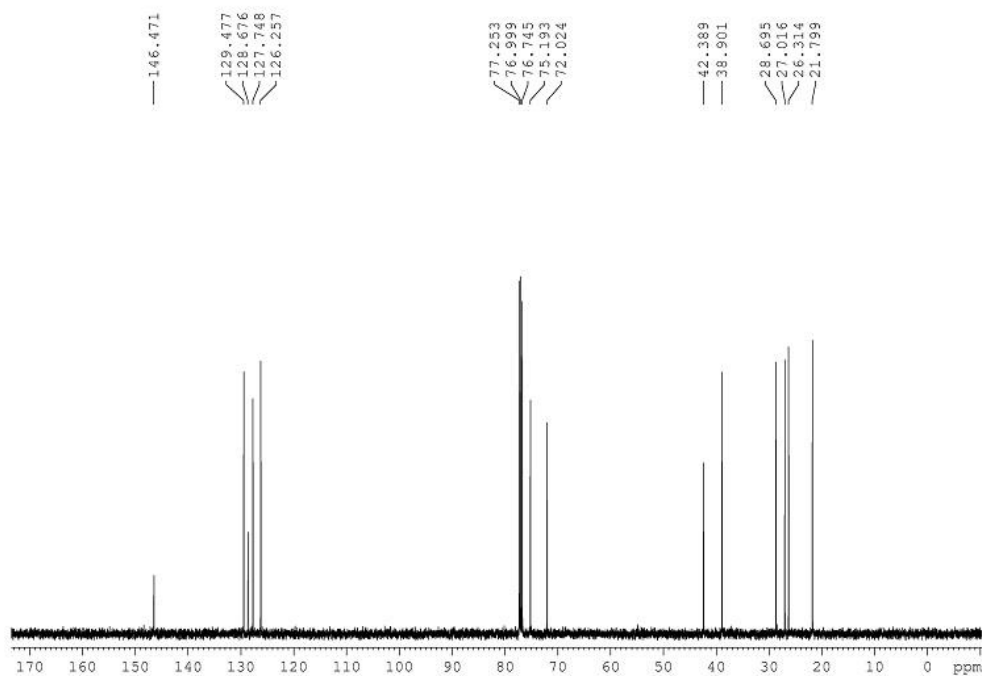

2-(2-hydroxypropan-2-yl)-4,4-dimethyl-5-phenyl-3,4-dihydro-2H-pyrrole 1-oxide (2I)

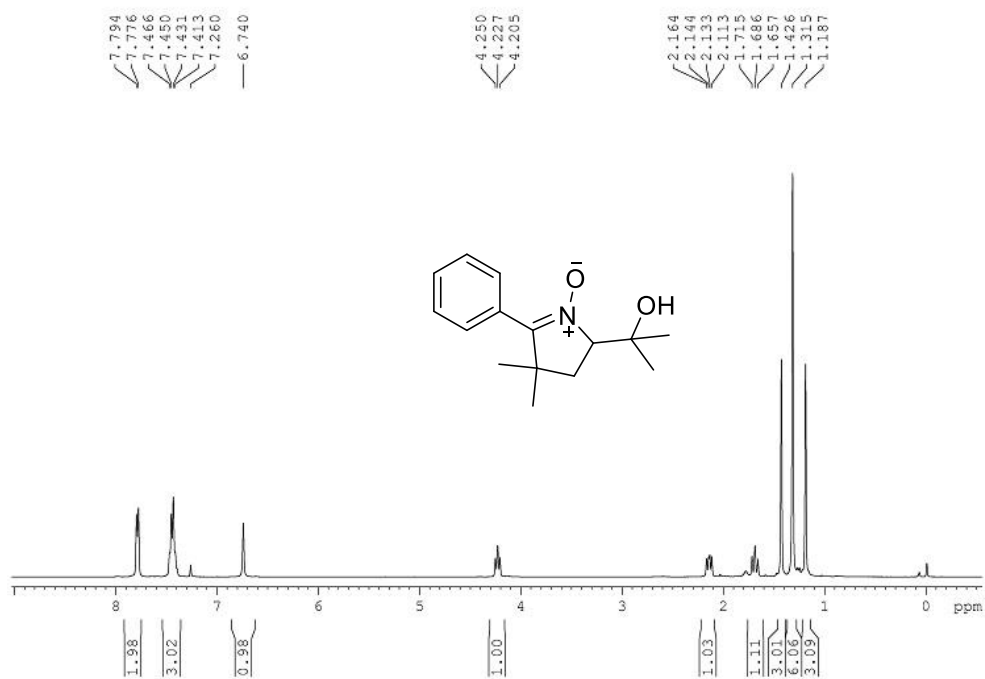

<sup>1</sup>H NMR (500 MHz, CDCl<sub>3</sub>)

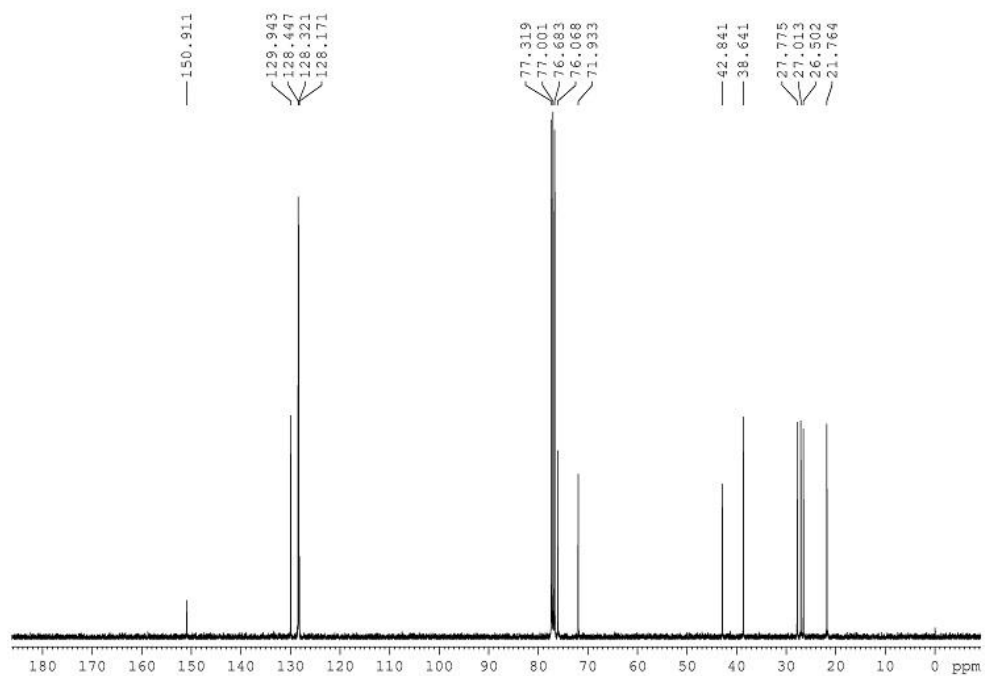

<sup>13</sup>C NMR (125 MHz, CDCl<sub>3</sub>)



7-(2-hydroxypropan-2-yl)-5-phenyl-6-azaspiro[3.4]oct-5-ene 6-oxide (2m)

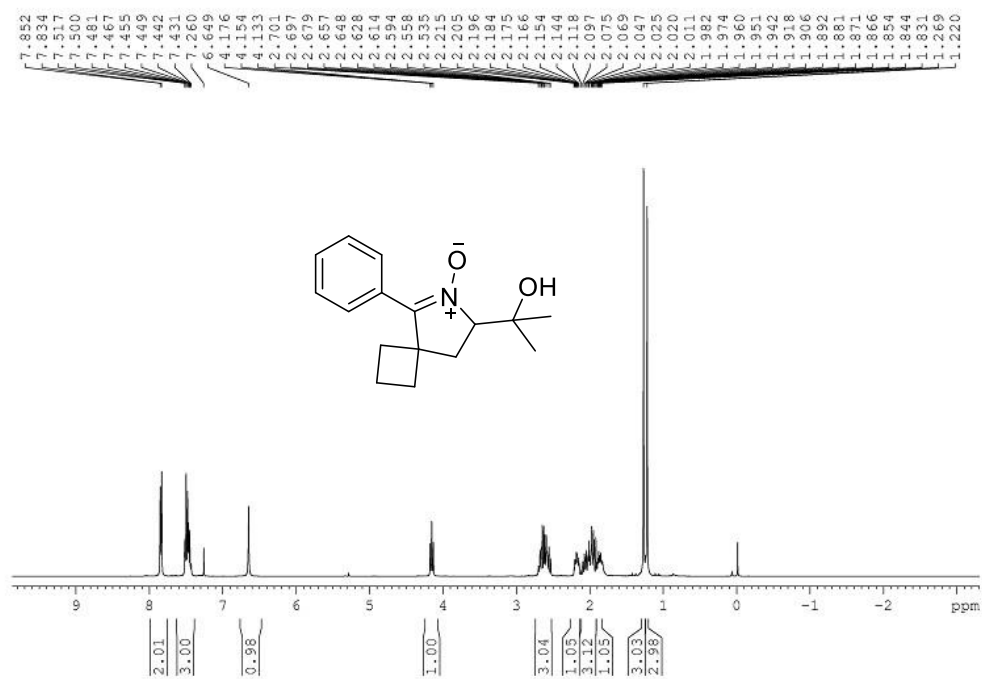

$^1\text{H NMR}$  (500 MHz,  $\text{CDCl}_3$ )

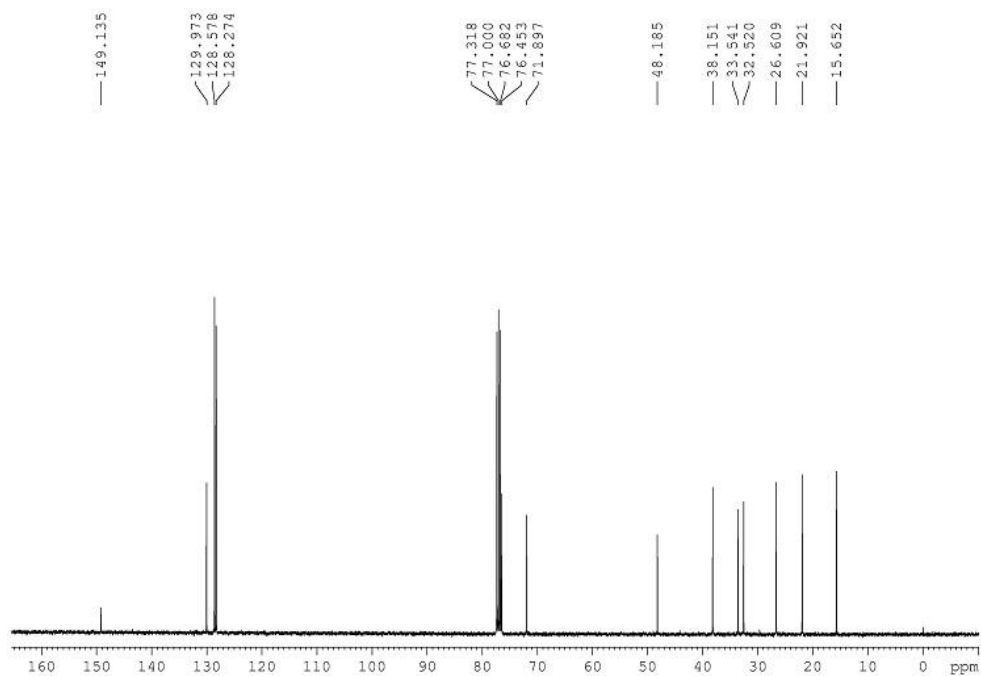

$^{13}\text{C NMR}$  (125 MHz,  $\text{CDCl}_3$ )

2-(3-hydroxypentan-3-yl)-4,4-dimethyl-5-phenyl-3,4-dihydro-2H-pyrrole 1-oxide (2n)

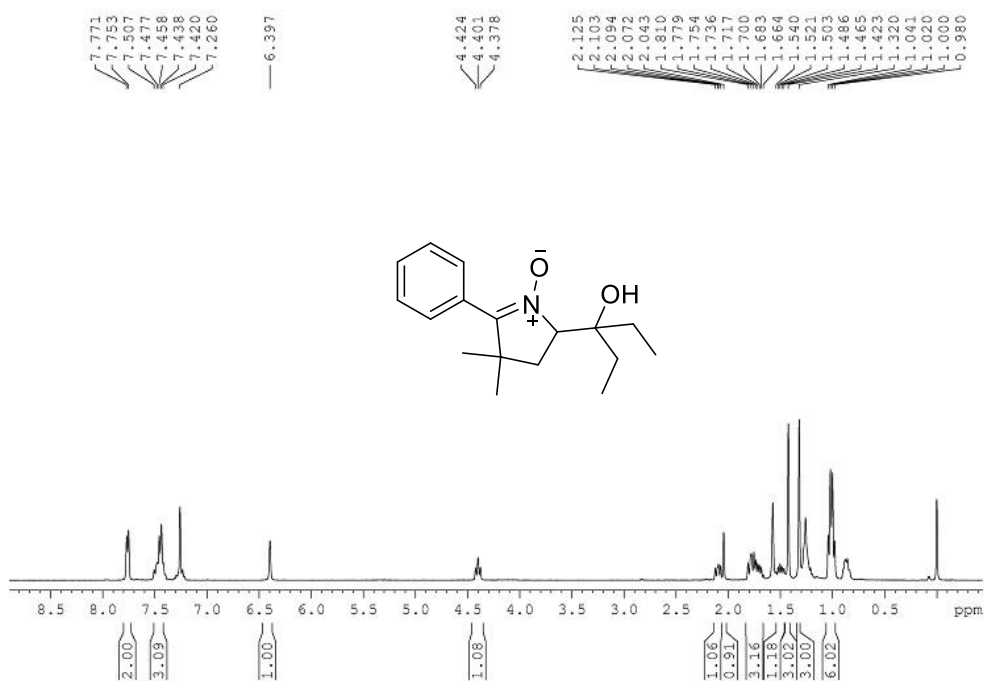

<sup>1</sup>H NMR (500 MHz, CDCl<sub>3</sub>)

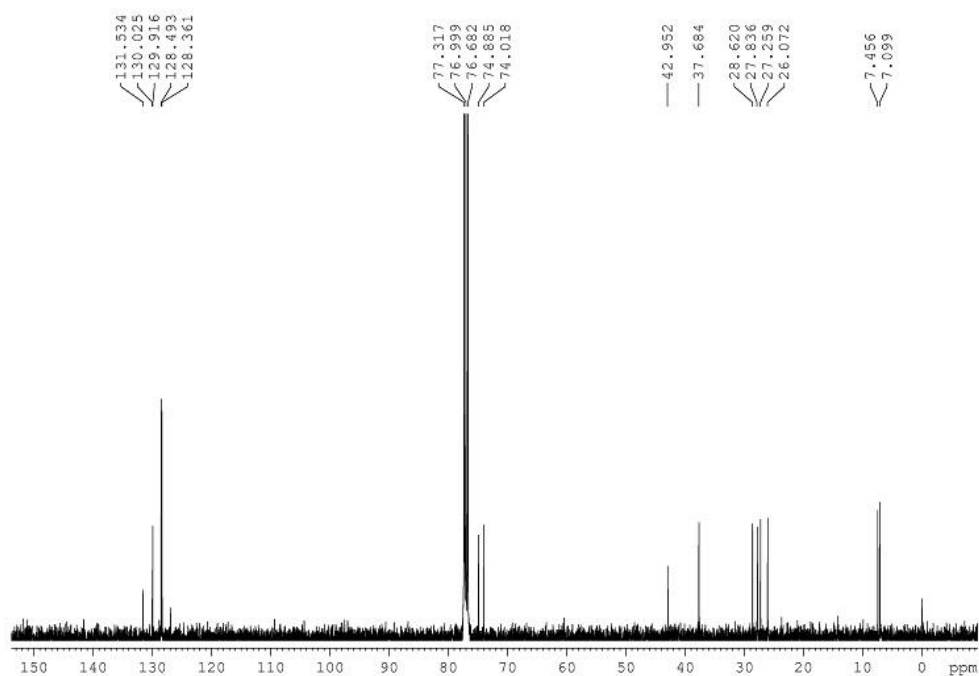

<sup>13</sup>C NMR (125 MHz, CDCl<sub>3</sub>)

2-(1-hydroxycyclohexyl)-4,4-dimethyl-5-phenyl-3,4-dihydro-2H-pyrrole1-oxide (2o)

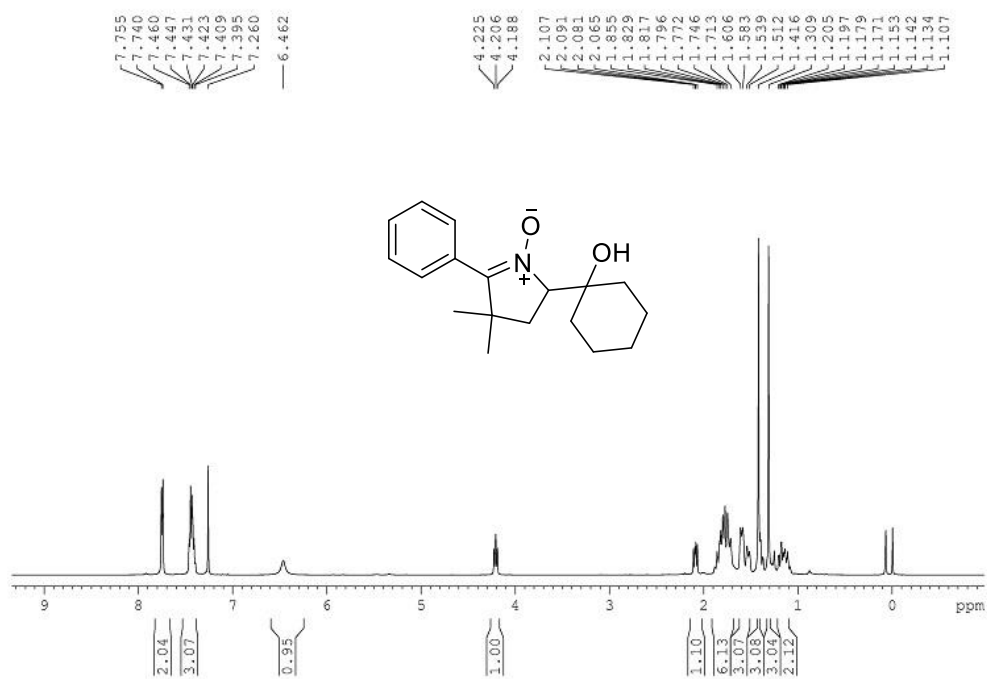

<sup>1</sup>H NMR (500 MHz, CDCl<sub>3</sub>)

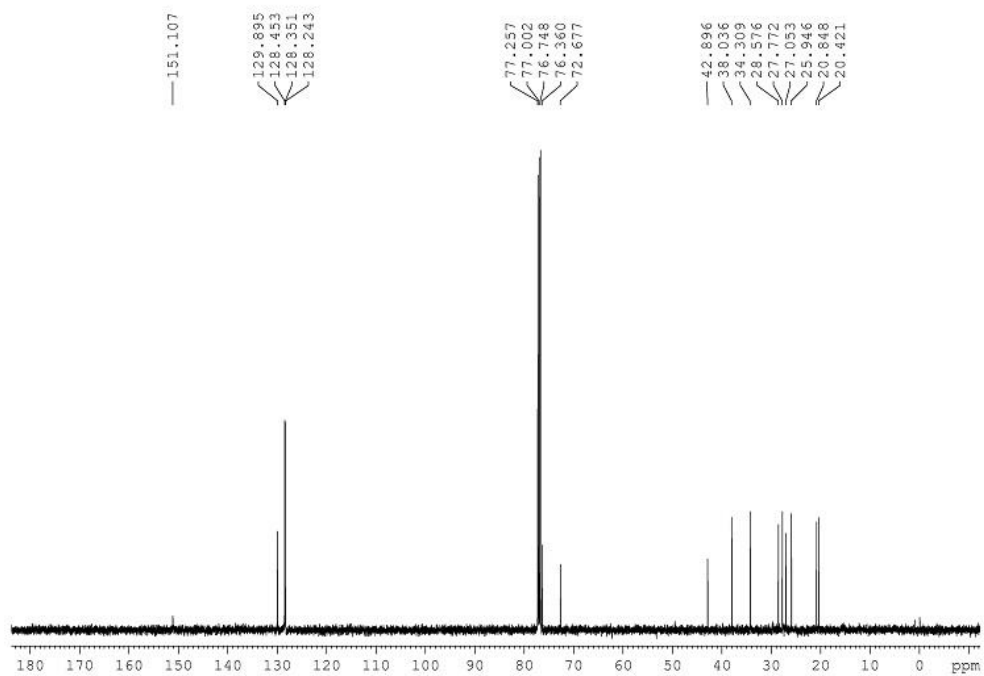

<sup>13</sup>C NMR (125 MHz, CDCl<sub>3</sub>)

**2-(1-hydroxycycloheptyl)-4,4-dimethyl-5-phenyl-3,4-dihydro-2H-pyrrole 1-oxide (2p)**

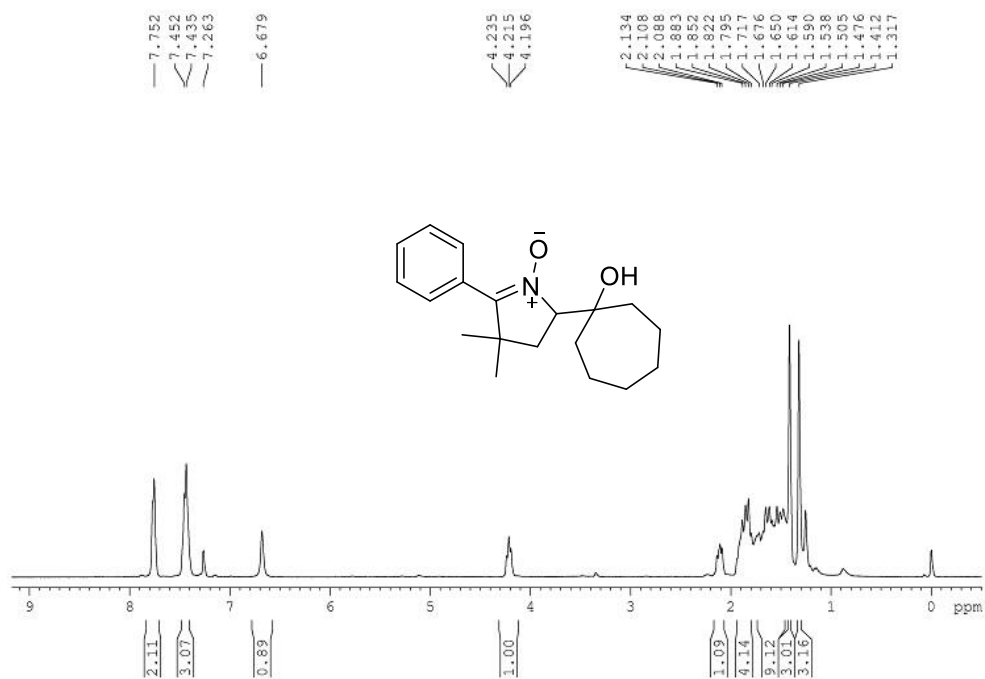

<sup>1</sup>H NMR (500 MHz, CDCl<sub>3</sub>)

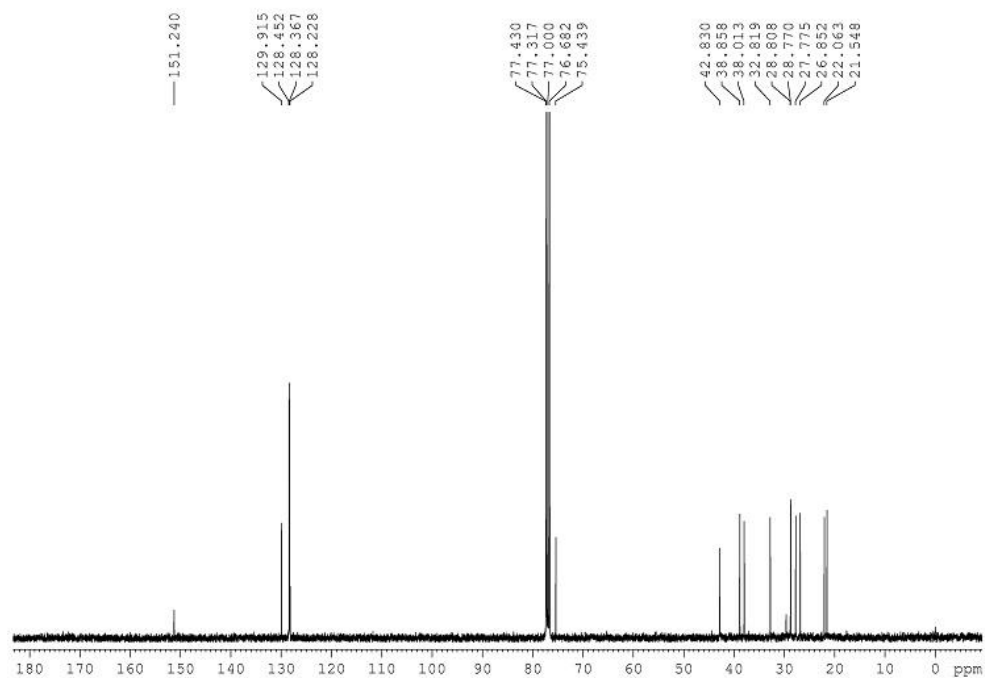

<sup>13</sup>C NMR (125 MHz, CDCl<sub>3</sub>)

**2-((1r,3r,5r,7r)-2-hydroxyadamantan-2-yl)-4,4-dimethyl-5-phenyl-3,4-dihydro-2H-pyrrole 1-oxide(2q)**

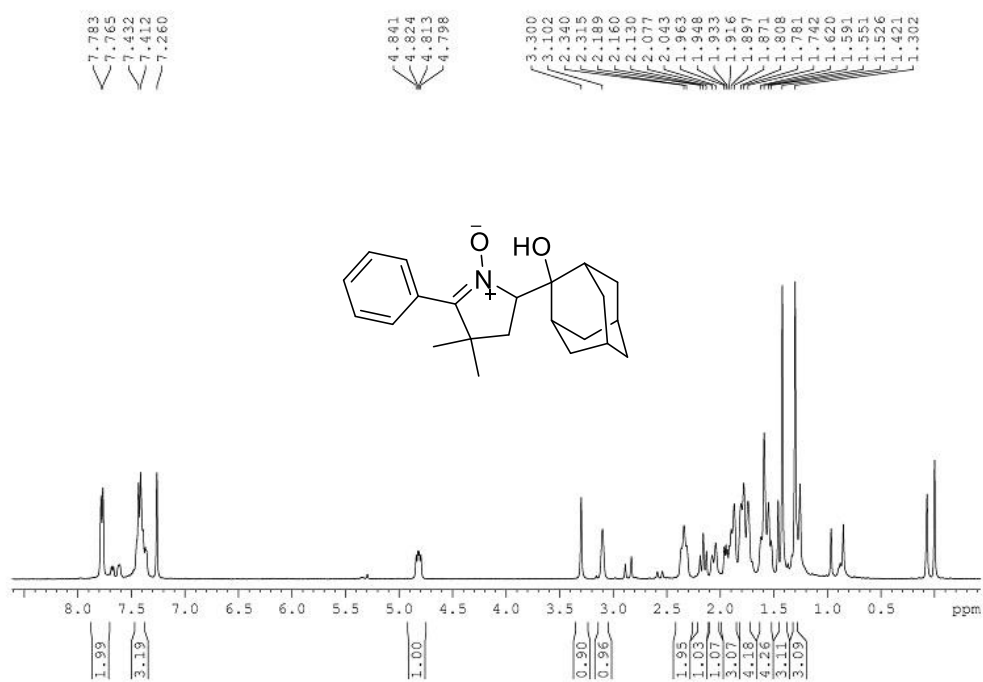

<sup>1</sup>H NMR (500 MHz, CDCl<sub>3</sub>)

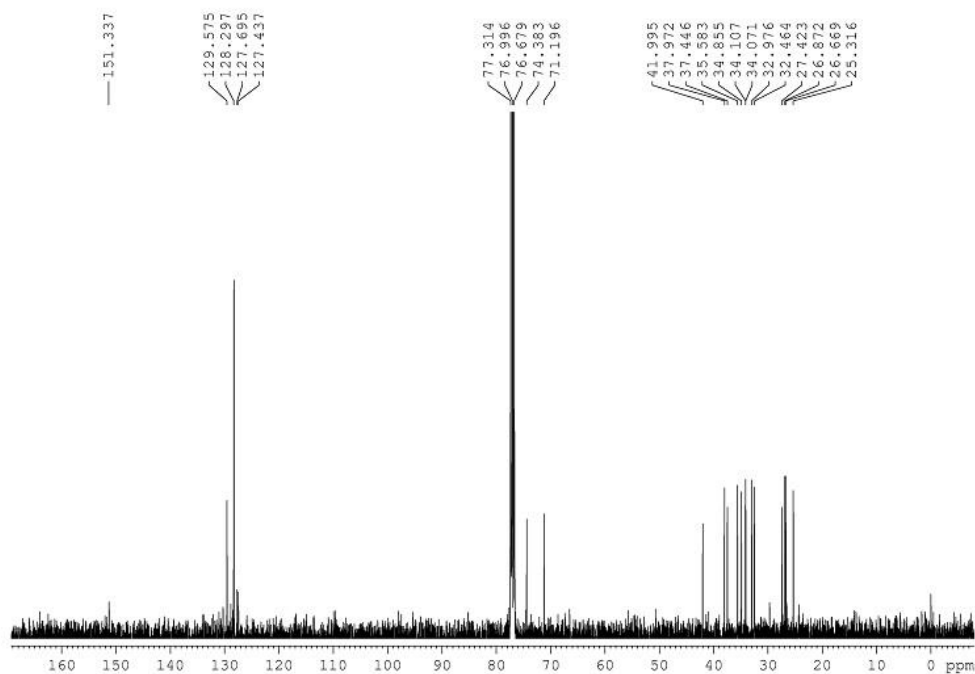

<sup>13</sup>C NMR (125 MHz, CDCl<sub>3</sub>)

2-(1-hydroxy-1-phenylethyl)-4,4-dimethyl-5-phenyl-3,4-dihydro-2H-pyrrole 1-oxide (2r)

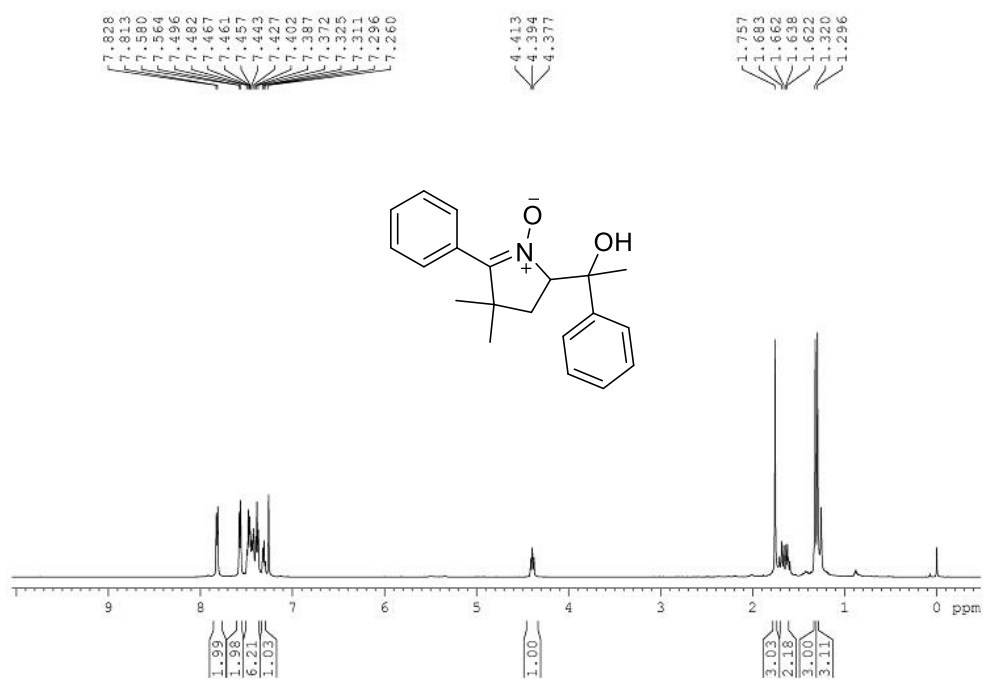

<sup>1</sup>H NMR (500 MHz, CDCl<sub>3</sub>)

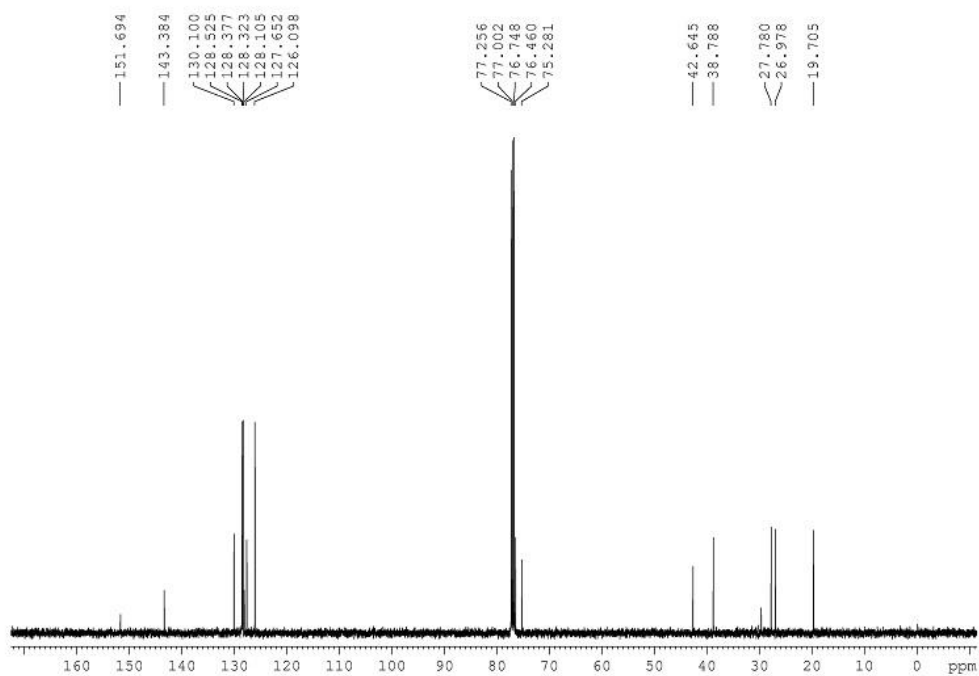

<sup>13</sup>C NMR (125 MHz, CDCl<sub>3</sub>)

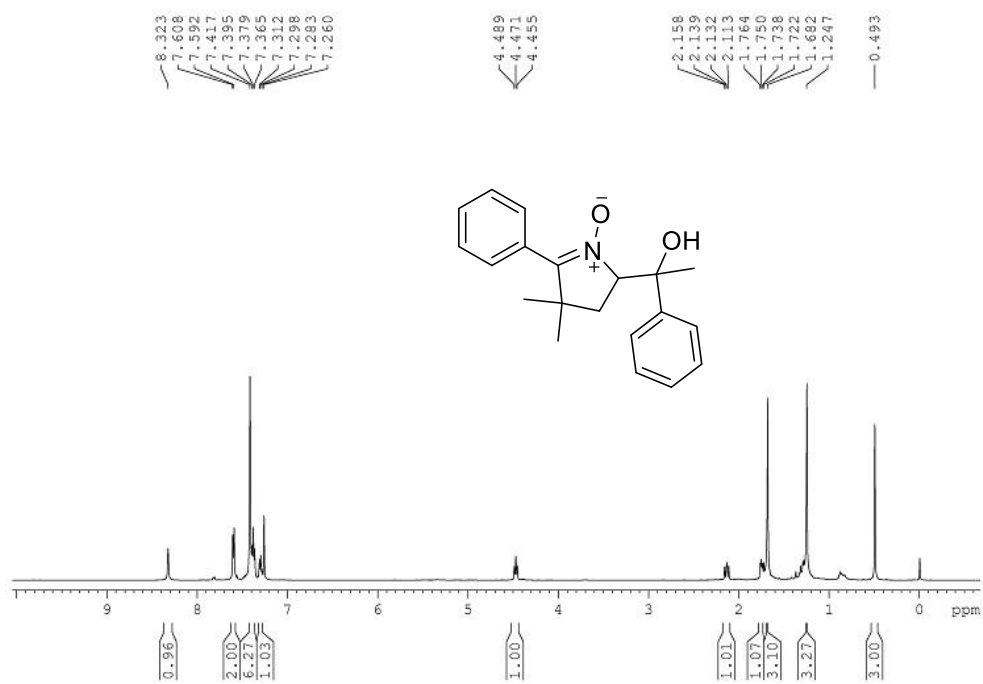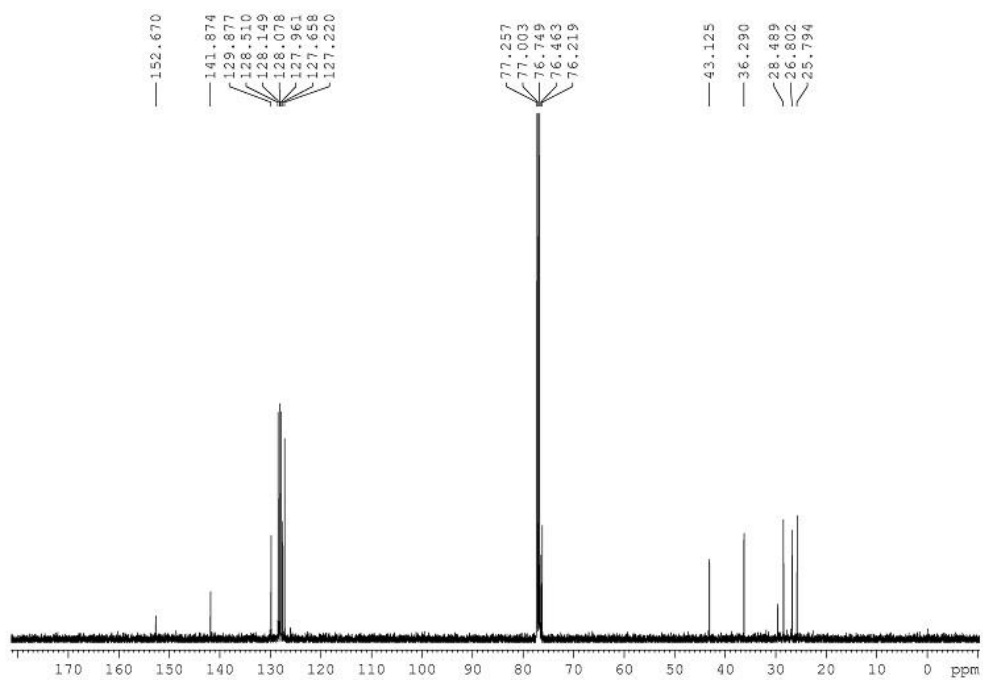

2-(2-hydroxy-4-methylpentan-2-yl)-4,4-dimethyl-5-phenyl-3,4-dihydro-2H-pyrrole1-oxide (2s)

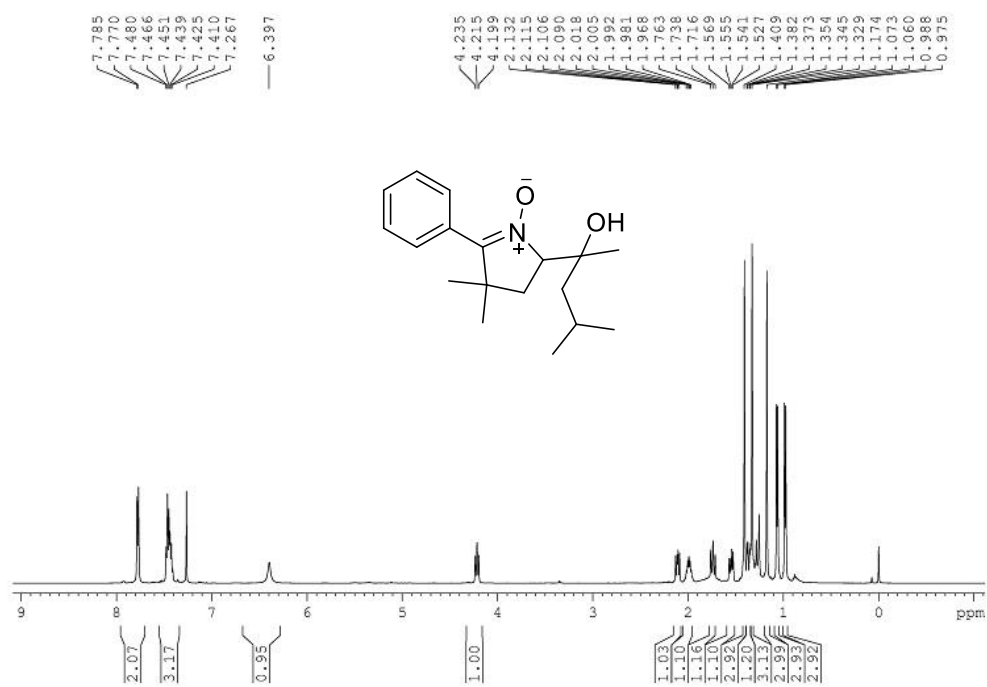

<sup>1</sup>H NMR (500 MHz, CDCl<sub>3</sub>)

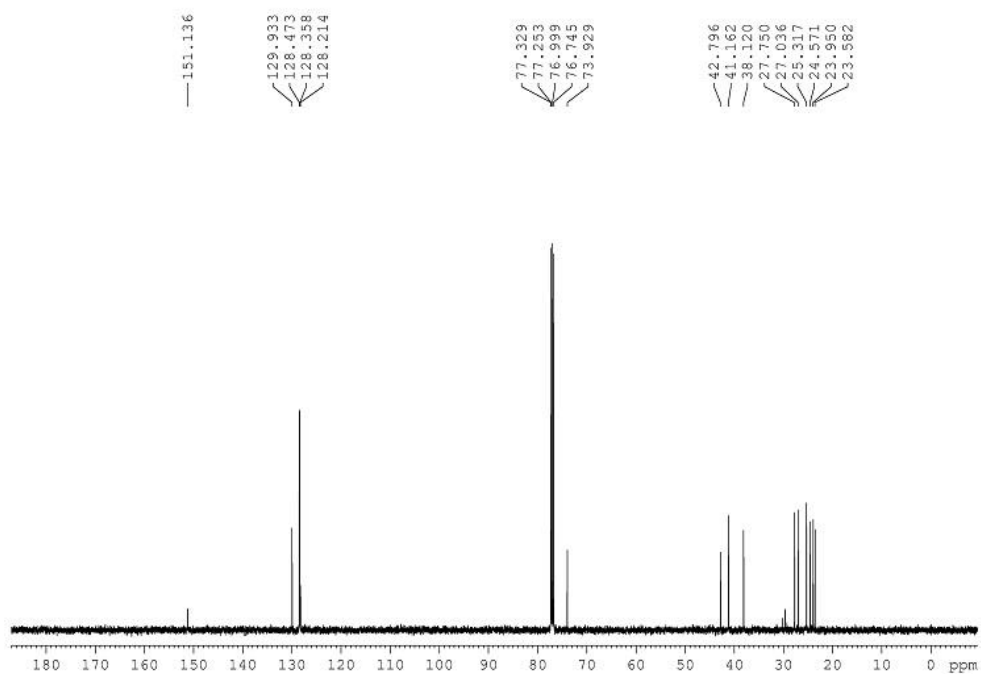

<sup>13</sup>C NMR (125 MHz, CDCl<sub>3</sub>)



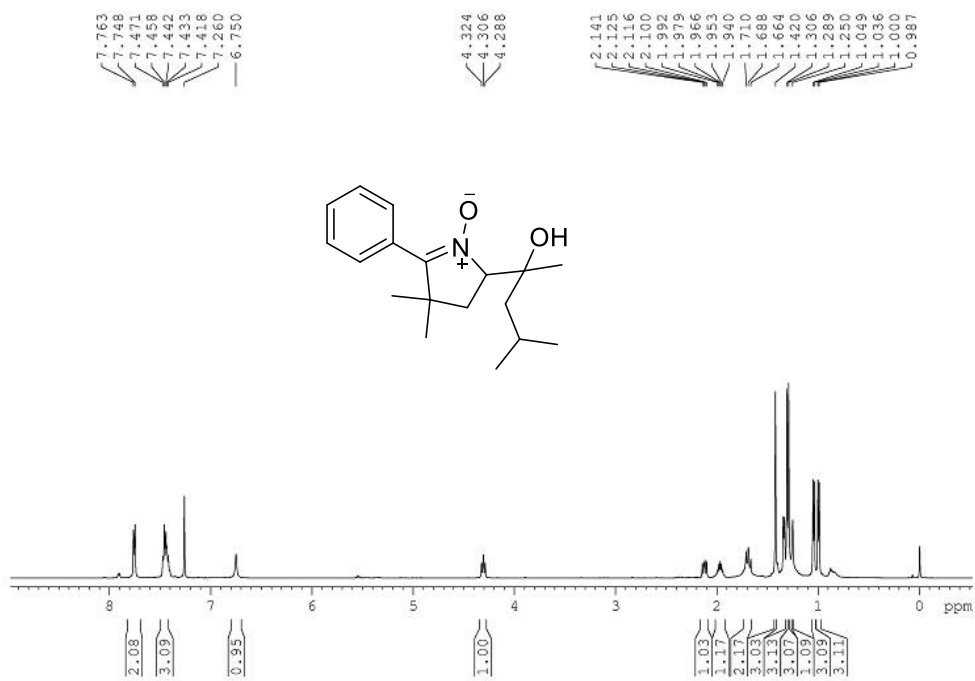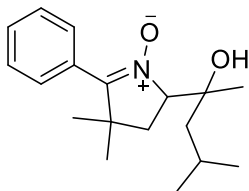

$^1\text{H}$  NMR (500 MHz,  $\text{CDCl}_3$ )

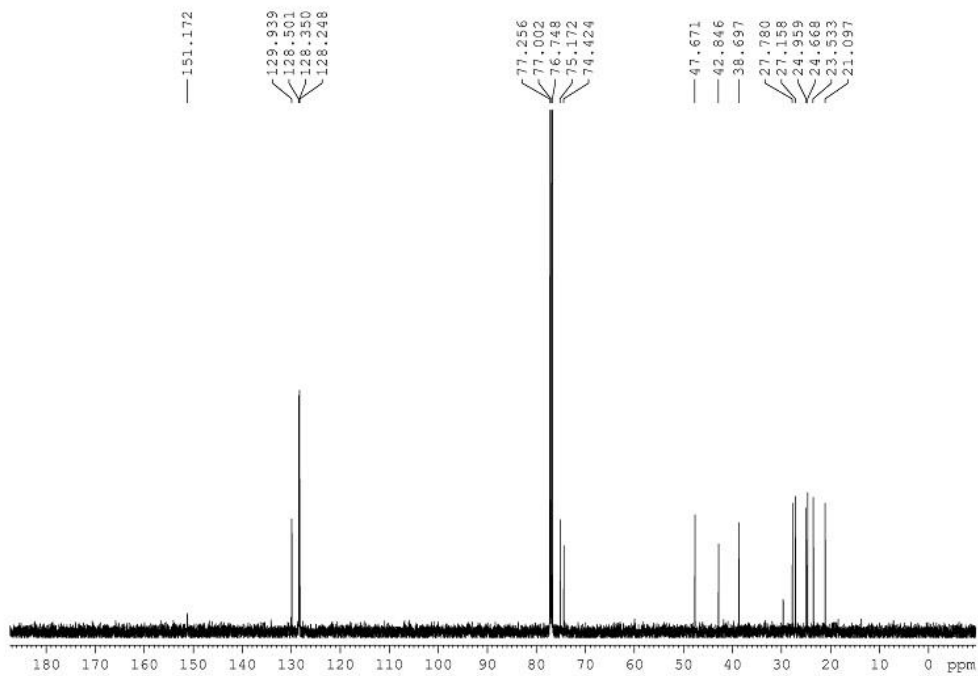

$^{13}\text{C}$  NMR (125 MHz,  $\text{CDCl}_3$ )

**2-(2-hydroxy-6,10,14-trimethylpentadecan-2-yl)-4,4-dimethyl-5-phenyl-3,4-dihydro-2H-pyrrole 1-oxide (2t)**

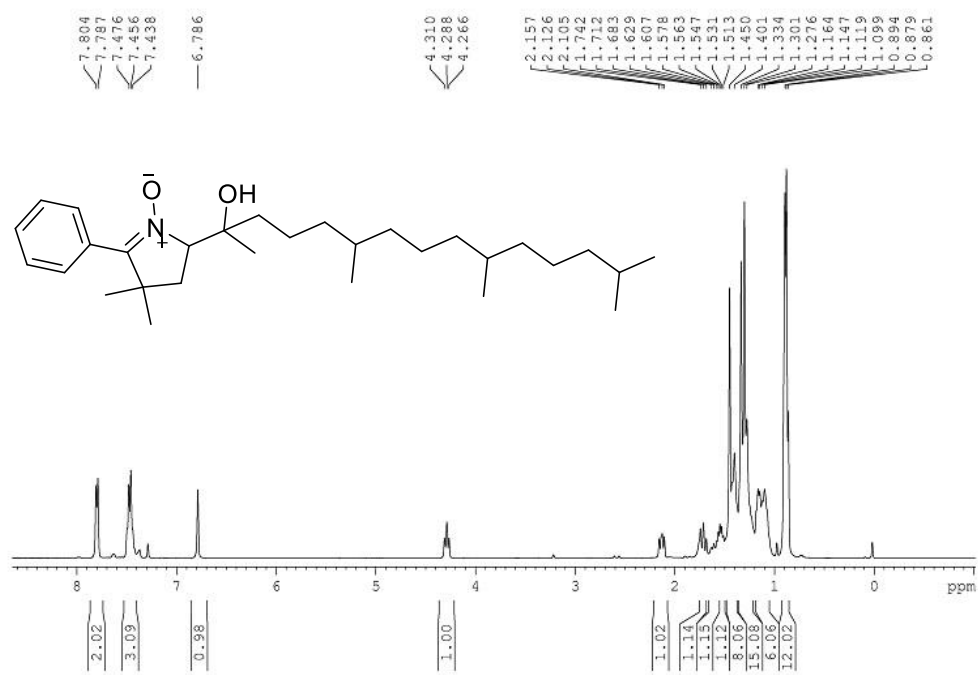

<sup>1</sup>H NMR (500 MHz, CDCl<sub>3</sub>)

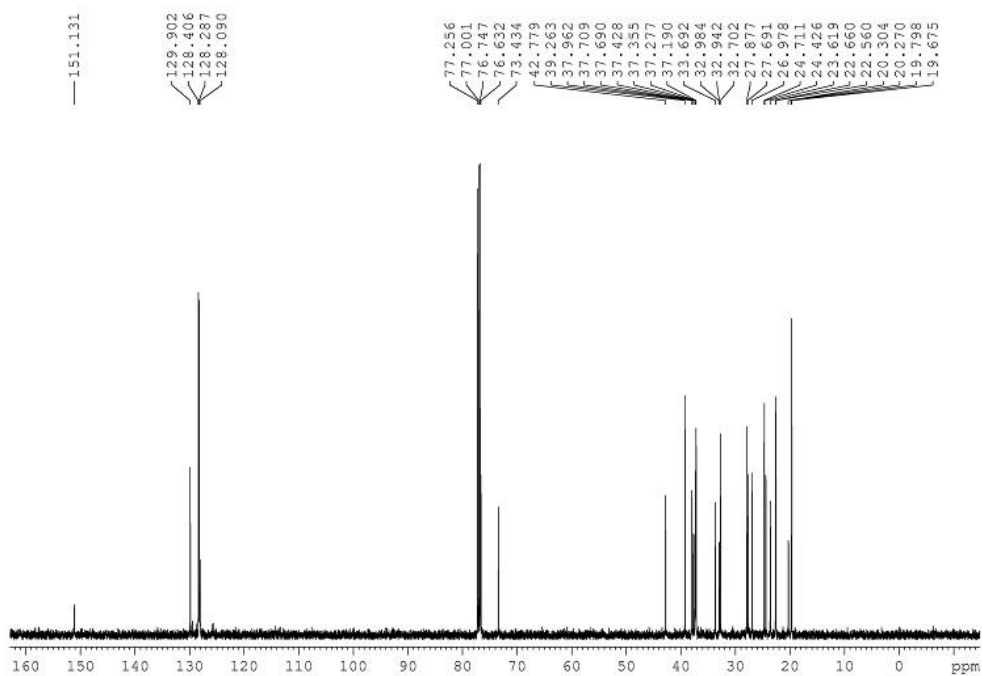

<sup>13</sup>C NMR (125 MHz, CDCl<sub>3</sub>)

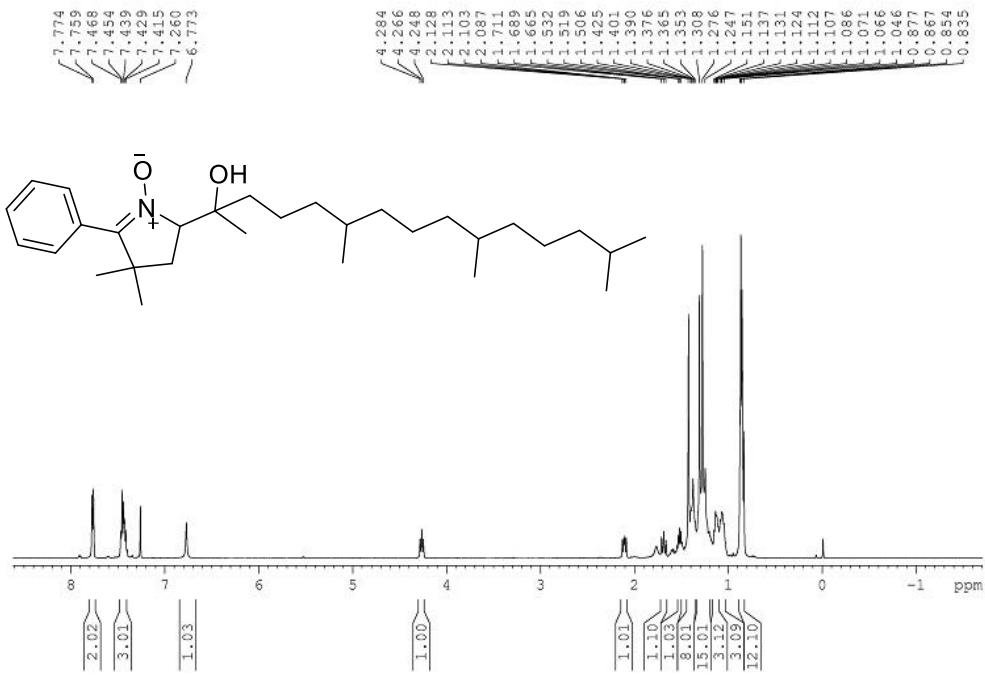

<sup>1</sup>H NMR (500 MHz, CDCl<sub>3</sub>)

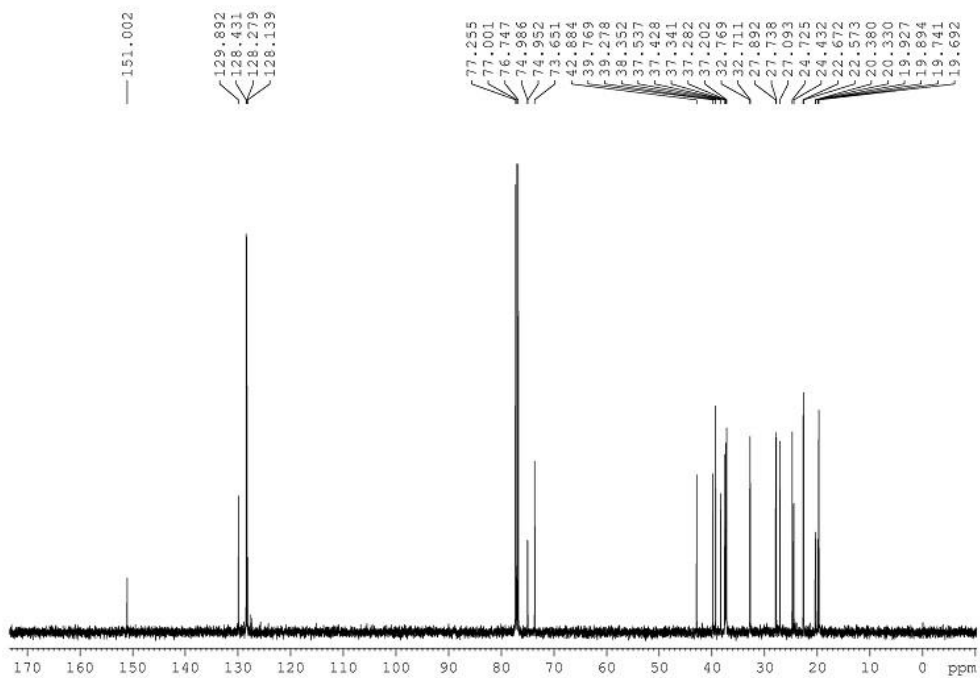

<sup>13</sup>C NMR (125 MHz, CDCl<sub>3</sub>)

2-(2-hydroxy-6-methylhept-5-en-2-yl)-5-phenyl-3,4-dihydro-2H-pyrrole 1-oxide (2u)

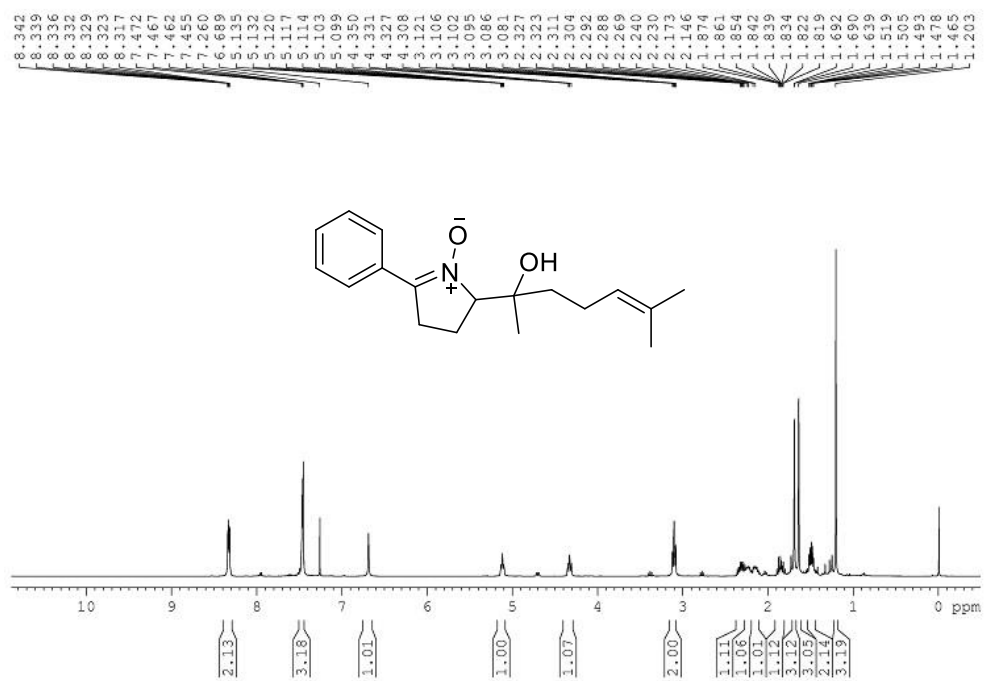

<sup>1</sup>H NMR (500 MHz, CDCl<sub>3</sub>)

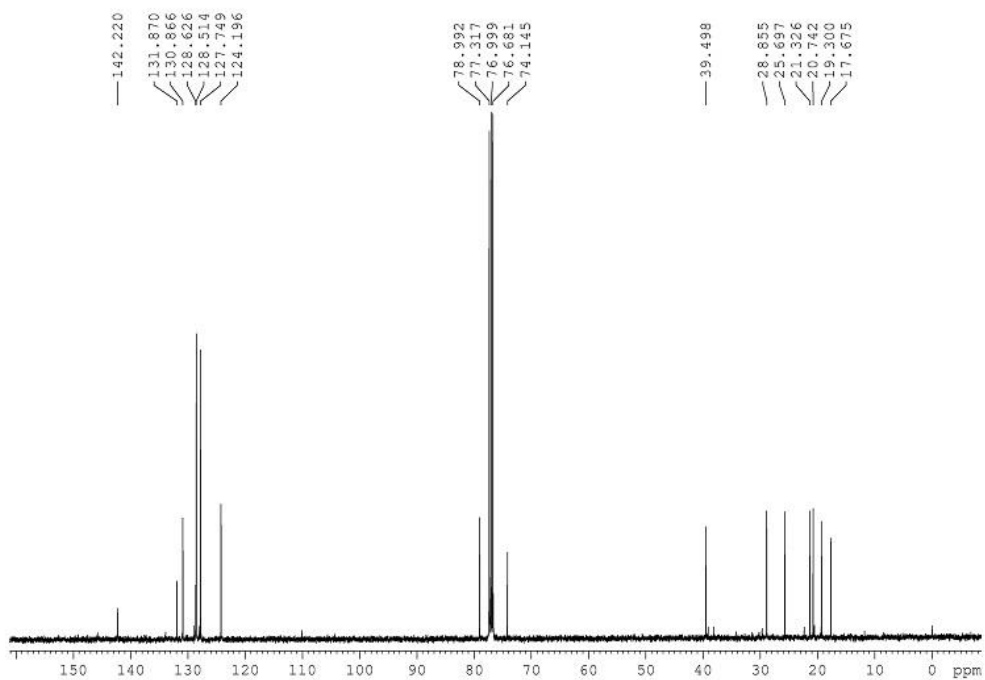

<sup>13</sup>C NMR (125 MHz, CDCl<sub>3</sub>)

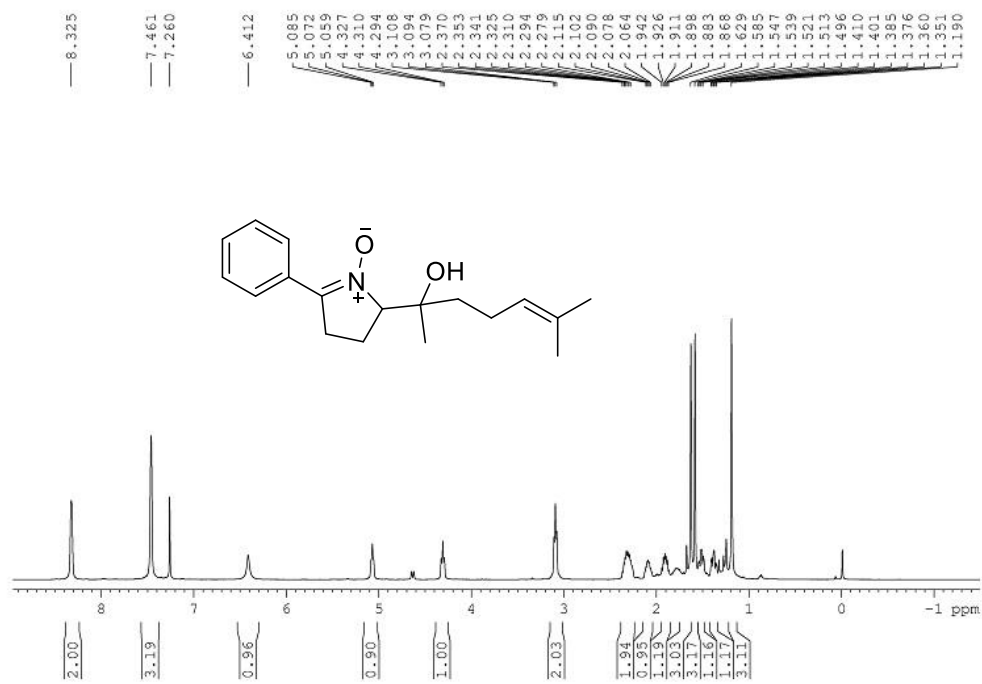

<sup>1</sup>H NMR (500 MHz, CDCl<sub>3</sub>)

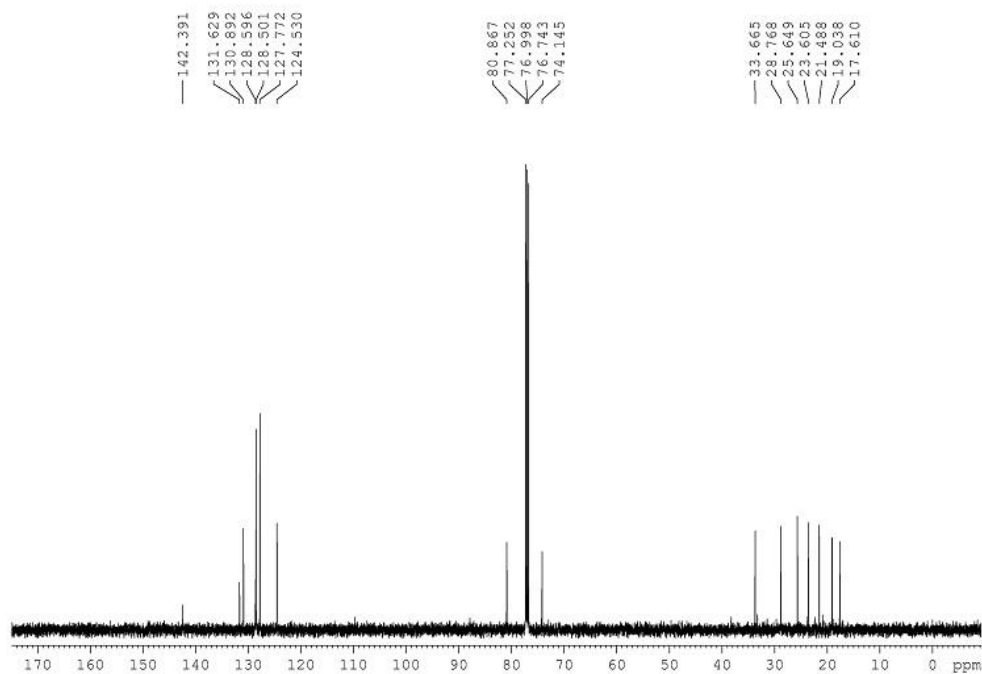

<sup>13</sup>C NMR (125 MHz, CDCl<sub>3</sub>)

### (D) The X-ray Single-Crystal Diffraction Analysis of **2a** (CCDC: 2106796)

Method for crystal growth: In a vial (25 mL) the product **2a** was dissolved in dichloromethane (1 mL), followed by addition of petroleum ether (2 mL). Then, the vial was covered with rubber cap (Don't seal it completely) and was set aside till the crystal formed. The crystal data for **2a** were integrated using the program SAINT and corrected for absorption effects using the program SADABS.<sup>[5]</sup> The structures were solved by direct methods and refined on F<sup>2</sup> by full-matrix least squares using SHELXTL-2014 software.

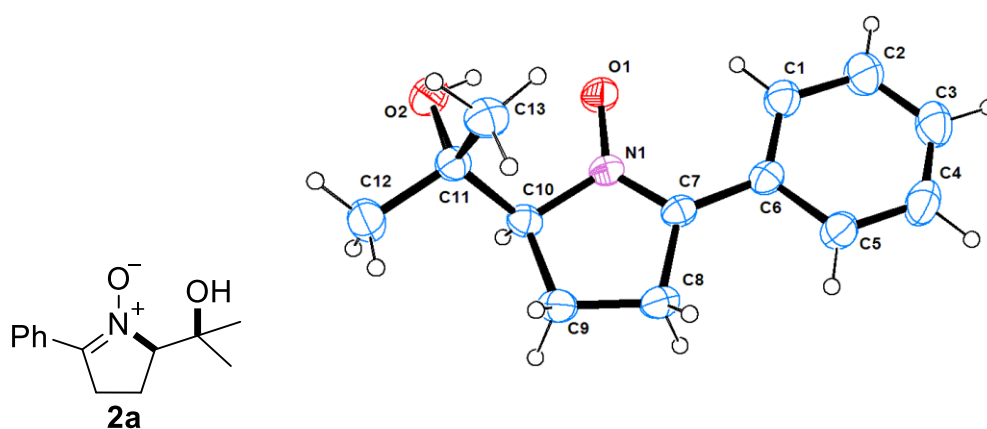

**The thermal ellipsoid plot of **2a** with 30% displacement ellipsoids**

Table S1. Crystal data and structure refinement for A.

|                        |                                                  |          |
|------------------------|--------------------------------------------------|----------|
| Identification code    | A                                                |          |
| Empirical formula      | C <sub>13</sub> H <sub>17</sub> N O <sub>2</sub> |          |
| Formula weight         | 219.27                                           |          |
| Temperature            | 296(2) K                                         |          |
| Wavelength             | 0.71073 Å                                        |          |
| Crystal system         | Orthorhombic                                     |          |
| Space group            | Pna2 <sub>1</sub>                                |          |
| Unit cell dimensions   | a = 10.1132(13) Å                                | α = 90°. |
|                        | b = 5.7769(7) Å                                  | β = 90°. |
|                        | c = 20.392(3) Å                                  | γ = 90°. |
| Volume                 | 1191.3(3) Å <sup>3</sup>                         |          |
| Z                      | 4                                                |          |
| Density (calculated)   | 1.223 Mg/m <sup>3</sup>                          |          |
| Absorption coefficient | 0.082 mm <sup>-1</sup>                           |          |

|                                   |                                             |
|-----------------------------------|---------------------------------------------|
| F(000)                            | 472                                         |
| Crystal size                      | 0.220 x 0.160 x 0.150 mm <sup>3</sup>       |
| Theta range for data collection   | 3.666 to 25.495°.                           |
| Index ranges                      | -12<=h<=12, -6<=k<=6, -24<=l<=23            |
| Reflections collected             | 8463                                        |
| Independent reflections           | 2194 [R(int) = 0.0203]                      |
| Completeness to theta = 25.242°   | 99.7 %                                      |
| Absorption correction             | Semi-empirical from equivalents             |
| Refinement method                 | Full-matrix least-squares on F <sup>2</sup> |
| Data / restraints / parameters    | 2194 / 1 / 148                              |
| Goodness-of-fit on F <sup>2</sup> | 1.040                                       |
| Final R indices [I>2sigma(I)]     | R1 = 0.0284, wR2 = 0.0738                   |
| R indices (all data)              | R1 = 0.0321, wR2 = 0.0772                   |
| Absolute structure parameter      | 1.1(4)                                      |
| Extinction coefficient            | n/a                                         |
| Largest diff. peak and hole       | 0.090 and -0.104 e.Å <sup>-3</sup>          |

Table S2. Atomic coordinates ( $\times 10^4$ ) and equivalent isotropic displacement parameters ( $\text{\AA}^2 \times 10^3$ ) for A.  $U(\text{eq})$  is defined as one third of the trace of the orthogonalized  $U^{ij}$  tensor.

|       | x       | y        | z       | U(eq) |
|-------|---------|----------|---------|-------|
| O(1)  | 1744(2) | -3144(2) | 1439(1) | 60(1) |
| O(2)  | 769(2)  | -3144(3) | 210(1)  | 62(1) |
| C(7)  | 1178(2) | 174(3)   | 2037(1) | 43(1) |
| C(8)  | 175(2)  | 2058(4)  | 1987(1) | 55(1) |
| C(9)  | -514(2) | 1654(4)  | 1330(1) | 55(1) |
| C(10) | -28(2)  | -688(4)  | 1079(1) | 46(1) |
| C(6)  | 2127(2) | -40(4)   | 2575(1) | 47(1) |
| C(5)  | 2127(3) | 1673(5)  | 3059(1) | 61(1) |
| C(1)  | 3030(2) | -1846(4) | 2640(1) | 60(1) |
| C(2)  | 3885(3) | -1930(6) | 3168(1) | 75(1) |
| C(4)  | 2984(3) | 1544(5)  | 3585(1) | 74(1) |
| C(3)  | 3864(3) | -238(6)  | 3642(1) | 72(1) |
| N(1)  | 1052(2) | -1274(3) | 1548(1) | 44(1) |
| C(13) | 1702(2) | 691(4)   | 266(1)  | 58(1) |
| C(12) | -627(2) | -54(5)   | -95(1)  | 68(1) |
| C(11) | 470(2)  | -785(4)  | 370(1)  | 47(1) |



Table S3. Bond lengths [Å] and angles [°] for A.

---

|                 |            |
|-----------------|------------|
| O(1)-N(1)       | 1.306(2)   |
| O(2)-C(11)      | 1.433(3)   |
| O(2)-H(2)       | 0.8200     |
| C(7)-N(1)       | 1.307(3)   |
| C(7)-C(6)       | 1.463(3)   |
| C(7)-C(8)       | 1.491(3)   |
| C(8)-C(9)       | 1.527(3)   |
| C(8)-H(8A)      | 0.9700     |
| C(8)-H(8B)      | 0.9700     |
| C(9)-C(10)      | 1.528(3)   |
| C(9)-H(9A)      | 0.9700     |
| C(9)-H(9B)      | 0.9700     |
| C(10)-N(1)      | 1.492(3)   |
| C(10)-C(11)     | 1.531(3)   |
| C(10)-H(10)     | 0.9800     |
| C(6)-C(1)       | 1.393(3)   |
| C(6)-C(5)       | 1.398(3)   |
| C(5)-C(4)       | 1.381(4)   |
| C(5)-H(5)       | 0.9300     |
| C(1)-C(2)       | 1.380(4)   |
| C(1)-H(1A)      | 0.9300     |
| C(2)-C(3)       | 1.376(4)   |
| C(2)-H(2A)      | 0.9300     |
| C(4)-C(3)       | 1.366(4)   |
| C(4)-H(4)       | 0.9300     |
| C(3)-H(3)       | 0.9300     |
| C(13)-C(11)     | 1.524(3)   |
| C(13)-H(13A)    | 0.9600     |
| C(13)-H(13B)    | 0.9600     |
| C(13)-H(13C)    | 0.9600     |
| C(12)-C(11)     | 1.521(3)   |
| C(12)-H(12A)    | 0.9600     |
| C(12)-H(12B)    | 0.9600     |
| C(12)-H(12C)    | 0.9600     |
| C(11)-O(2)-H(2) | 109.5      |
| N(1)-C(7)-C(6)  | 125.57(18) |

|                   |            |
|-------------------|------------|
| N(1)-C(7)-C(8)    | 110.38(18) |
| C(6)-C(7)-C(8)    | 124.01(18) |
| C(7)-C(8)-C(9)    | 105.02(17) |
| C(7)-C(8)-H(8A)   | 110.7      |
| C(9)-C(8)-H(8A)   | 110.7      |
| C(7)-C(8)-H(8B)   | 110.7      |
| C(9)-C(8)-H(8B)   | 110.7      |
| H(8A)-C(8)-H(8B)  | 108.8      |
| C(8)-C(9)-C(10)   | 106.43(18) |
| C(8)-C(9)-H(9A)   | 110.4      |
| C(10)-C(9)-H(9A)  | 110.4      |
| C(8)-C(9)-H(9B)   | 110.4      |
| C(10)-C(9)-H(9B)  | 110.4      |
| H(9A)-C(9)-H(9B)  | 108.6      |
| N(1)-C(10)-C(9)   | 102.75(16) |
| N(1)-C(10)-C(11)  | 110.85(16) |
| C(9)-C(10)-C(11)  | 117.06(18) |
| N(1)-C(10)-H(10)  | 108.6      |
| C(9)-C(10)-H(10)  | 108.6      |
| C(11)-C(10)-H(10) | 108.6      |
| C(1)-C(6)-C(5)    | 117.5(2)   |
| C(1)-C(6)-C(7)    | 124.44(19) |
| C(5)-C(6)-C(7)    | 118.0(2)   |
| C(4)-C(5)-C(6)    | 120.7(3)   |
| C(4)-C(5)-H(5)    | 119.6      |
| C(6)-C(5)-H(5)    | 119.6      |
| C(2)-C(1)-C(6)    | 120.8(2)   |
| C(2)-C(1)-H(1A)   | 119.6      |
| C(6)-C(1)-H(1A)   | 119.6      |
| C(3)-C(2)-C(1)    | 120.9(3)   |
| C(3)-C(2)-H(2A)   | 119.6      |
| C(1)-C(2)-H(2A)   | 119.6      |
| C(3)-C(4)-C(5)    | 121.1(3)   |
| C(3)-C(4)-H(4)    | 119.5      |
| C(5)-C(4)-H(4)    | 119.5      |
| C(4)-C(3)-C(2)    | 119.0(3)   |
| C(4)-C(3)-H(3)    | 120.5      |
| C(2)-C(3)-H(3)    | 120.5      |

|                     |            |
|---------------------|------------|
| O(1)-N(1)-C(7)      | 127.35(18) |
| O(1)-N(1)-C(10)     | 118.07(16) |
| C(7)-N(1)-C(10)     | 114.57(16) |
| C(11)-C(13)-H(13A)  | 109.5      |
| C(11)-C(13)-H(13B)  | 109.5      |
| H(13A)-C(13)-H(13B) | 109.5      |
| C(11)-C(13)-H(13C)  | 109.5      |
| H(13A)-C(13)-H(13C) | 109.5      |
| H(13B)-C(13)-H(13C) | 109.5      |
| C(11)-C(12)-H(12A)  | 109.5      |
| C(11)-C(12)-H(12B)  | 109.5      |
| H(12A)-C(12)-H(12B) | 109.5      |
| C(11)-C(12)-H(12C)  | 109.5      |
| H(12A)-C(12)-H(12C) | 109.5      |
| H(12B)-C(12)-H(12C) | 109.5      |
| O(2)-C(11)-C(12)    | 105.99(18) |
| O(2)-C(11)-C(13)    | 109.17(17) |
| C(12)-C(11)-C(13)   | 110.8(2)   |
| O(2)-C(11)-C(10)    | 108.58(18) |
| C(12)-C(11)-C(10)   | 109.78(17) |
| C(13)-C(11)-C(10)   | 112.32(18) |

---

Symmetry transformations used to generate equivalent atoms:

Table S4. Anisotropic displacement parameters ( $\text{\AA}^2 \times 10^3$ ) for A. The anisotropic displacement factor exponent takes the form:  $-2\pi^2 [ h^2 a^{*2} U^{11} + \dots + 2 h k a^* b^* U^{12} ]$

|       | U <sup>11</sup> | U <sup>22</sup> | U <sup>33</sup> | U <sup>23</sup> | U <sup>13</sup> | U <sup>12</sup> |
|-------|-----------------|-----------------|-----------------|-----------------|-----------------|-----------------|
| O(1)  | 73(1)           | 45(1)           | 62(1)           | -9(1)           | -7(1)           | 20(1)           |
| O(2)  | 73(1)           | 50(1)           | 62(1)           | -13(1)          | 0(1)            | -2(1)           |
| C(7)  | 44(1)           | 41(1)           | 46(1)           | -1(1)           | 9(1)            | -2(1)           |
| C(8)  | 54(1)           | 50(1)           | 60(1)           | -8(1)           | 8(1)            | 7(1)            |
| C(9)  | 50(1)           | 54(1)           | 61(1)           | -1(1)           | 4(1)            | 11(1)           |
| C(10) | 38(1)           | 45(1)           | 54(1)           | 0(1)            | 2(1)            | -2(1)           |
| C(6)  | 48(1)           | 50(1)           | 42(1)           | 0(1)            | 11(1)           | -7(1)           |
| C(5)  | 59(2)           | 66(2)           | 57(2)           | -13(1)          | 5(1)            | -1(1)           |
| C(1)  | 68(2)           | 62(2)           | 51(1)           | 0(1)            | -2(1)           | 7(1)            |
| C(2)  | 82(2)           | 82(2)           | 60(2)           | 6(1)            | -11(1)          | 11(2)           |
| C(4)  | 82(2)           | 90(2)           | 50(1)           | -18(1)          | 5(1)            | -16(2)          |
| C(3)  | 74(2)           | 93(2)           | 50(1)           | 5(1)            | -7(1)           | -10(2)          |
| N(1)  | 46(1)           | 39(1)           | 48(1)           | -2(1)           | 4(1)            | 3(1)            |
| C(13) | 51(1)           | 57(1)           | 65(2)           | 1(1)            | 10(1)           | -8(1)           |
| C(12) | 56(1)           | 91(2)           | 57(2)           | 2(1)            | -7(1)           | 2(1)            |
| C(11) | 43(1)           | 47(1)           | 50(1)           | -4(1)           | 2(1)            | -3(1)           |

Table S5. Hydrogen coordinates ( $\times 10^4$ ) and isotropic displacement parameters ( $\text{\AA}^2 \times 10^{-3}$ ) for A.

|        | x     | y     | z    | U(eq) |
|--------|-------|-------|------|-------|
| H(2)   | 1152  | -3755 | 520  | 92    |
| H(8A)  | 598   | 3565  | 1995 | 66    |
| H(8B)  | -452  | 1968  | 2346 | 66    |
| H(9A)  | -289  | 2872  | 1022 | 66    |
| H(9B)  | -1466 | 1635  | 1388 | 66    |
| H(10)  | -742  | -1822 | 1130 | 55    |
| H(5)   | 1544  | 2912  | 3027 | 73    |
| H(1A)  | 3057  | -3009 | 2325 | 72    |
| H(2A)  | 4484  | -3146 | 3202 | 90    |
| H(4)   | 2962  | 2689  | 3905 | 89    |
| H(3)   | 4440  | -307  | 3997 | 87    |
| H(13A) | 2415  | 83    | 525  | 86    |
| H(13B) | 1523  | 2255  | 398  | 86    |
| H(13C) | 1944  | 663   | -189 | 86    |
| H(12A) | -359  | -345  | -539 | 102   |
| H(12B) | -803  | 1567  | -40  | 102   |
| H(12C) | -1413 | -923  | 0    | 102   |

Table S6. Torsion angles [°] for A.

---

|                        |             |
|------------------------|-------------|
| N(1)-C(7)-C(8)-C(9)    | -5.8(2)     |
| C(6)-C(7)-C(8)-C(9)    | 176.31(18)  |
| C(7)-C(8)-C(9)-C(10)   | 9.0(2)      |
| C(8)-C(9)-C(10)-N(1)   | -8.7(2)     |
| C(8)-C(9)-C(10)-C(11)  | -130.4(2)   |
| N(1)-C(7)-C(6)-C(1)    | -0.4(3)     |
| C(8)-C(7)-C(6)-C(1)    | 177.2(2)    |
| N(1)-C(7)-C(6)-C(5)    | -180.0(2)   |
| C(8)-C(7)-C(6)-C(5)    | -2.4(3)     |
| C(1)-C(6)-C(5)-C(4)    | -0.8(3)     |
| C(7)-C(6)-C(5)-C(4)    | 178.8(2)    |
| C(5)-C(6)-C(1)-C(2)    | 0.2(4)      |
| C(7)-C(6)-C(1)-C(2)    | -179.3(2)   |
| C(6)-C(1)-C(2)-C(3)    | 0.3(4)      |
| C(6)-C(5)-C(4)-C(3)    | 0.8(4)      |
| C(5)-C(4)-C(3)-C(2)    | -0.3(4)     |
| C(1)-C(2)-C(3)-C(4)    | -0.2(5)     |
| C(6)-C(7)-N(1)-O(1)    | -1.0(3)     |
| C(8)-C(7)-N(1)-O(1)    | -178.82(19) |
| C(6)-C(7)-N(1)-C(10)   | 177.93(18)  |
| C(8)-C(7)-N(1)-C(10)   | 0.1(2)      |
| C(9)-C(10)-N(1)-O(1)   | -175.38(17) |
| C(11)-C(10)-N(1)-O(1)  | -49.6(2)    |
| C(9)-C(10)-N(1)-C(7)   | 5.6(2)      |
| C(11)-C(10)-N(1)-C(7)  | 131.45(19)  |
| N(1)-C(10)-C(11)-O(2)  | 67.6(2)     |
| C(9)-C(10)-C(11)-O(2)  | -175.00(17) |
| N(1)-C(10)-C(11)-C(12) | -176.91(18) |
| C(9)-C(10)-C(11)-C(12) | -59.5(2)    |
| N(1)-C(10)-C(11)-C(13) | -53.2(2)    |
| C(9)-C(10)-C(11)-C(13) | 64.2(2)     |

---

Symmetry transformations used to generate equivalent atoms:

Table S7. Hydrogen bonds for A [Å and °].

| D-H...A              | d(D-H) | d(H...A) | d(D...A) | <(DHA) |
|----------------------|--------|----------|----------|--------|
| C(10)-H(10)...O(1)#1 | 0.98   | 2.62     | 3.413(3) | 138.2  |
| C(8)-H(8A)...O(1)#2  | 0.97   | 2.50     | 3.383(3) | 151.5  |
| O(2)-H(2)...N(1)     | 0.82   | 2.54     | 2.948(2) | 111.9  |
| O(2)-H(2)...O(1)     | 0.82   | 2.00     | 2.693(2) | 141.9  |
| C(10)-H(10)...O(1)#1 | 0.98   | 2.62     | 3.413(3) | 138.2  |
| C(8)-H(8A)...O(1)#2  | 0.97   | 2.50     | 3.383(3) | 151.5  |
| O(2)-H(2)...N(1)     | 0.82   | 2.54     | 2.948(2) | 111.9  |
| O(2)-H(2)...O(1)     | 0.82   | 2.00     | 2.693(2) | 141.9  |

Symmetry transformations used to generate equivalent atoms:

#1  $x-1/2, -y-1/2, z$     #2  $x, y+1, z$

## (E) References

- 1 (a) B. Han, X.-L. Yang, R. Fang, W. Yu, C. Wang, X.-Y. Duan and S. Liu, Oxime Radical Promoted Dioxygenation, Oxyamination, and Diamination of Alkenes: Synthesis of Isoxazolines and Cyclic Nitrones, *Angew. Chem. Int. Ed.*, 2012, **51**, 8816-8820; (b) K. Usami, E. Yamaguchi, N. Tada and A. Itoh, Visible-Light-Mediated Iminyl Radical Generation from Benzyl Oxime Ether: Synthesis of Pyrroline via Hydroimination Cyclization. *Org. Lett.*, 2018, **20**, 18, 5714-5717; (c) C. Chen, Y.-W. Bao, J.-H. Zhao and B.-L. Zhu, Silver-promoted cascade radical cyclization of  $\gamma,\delta$ -unsaturated oxime esters with P(O)H compounds: synthesis of phosphorylated pyrrolines. *Chem. Commun.*, 2019, **55**, 14697-14700; (d) X.-L. Zhang, Q. Chen, R.-J. Song, J. Xu, W.-Y. Tian, S.-Y. Li, Z.-C. Jin and Y.-G. Chi, Carbene-Catalyzed  $\alpha,\gamma$ -Deuteration of Enals under Oxidative Conditions. *ACS Catal.*, 2020, **10**, 5475-5482.
